# Supplementary material
Source: publisher figshare collection journal article supplement (https://geolsoc.figshare.com/ndownloader/files/32541150)
Supplement: Supplementary file 1 [file 32541150]

Table S1. Detrital zircon U-Pb data for the sandstones and crystal tuff samples from the Late Cretaceous terrestrial successions in the Ganzhou Basin, south China.

| Samples |  | Isotopic ratios | | | | | | | | | | | | | | | | | U-Pb Ages(Ma) | | | | | | | | | | | | | | | | | |  | | |
| --- | --- | --- | --- | --- | --- | --- | --- | --- | --- | --- | --- | --- | --- | --- | --- | --- | --- | --- | --- | --- | --- | --- | --- | --- | --- | --- | --- | --- | --- | --- | --- | --- | --- | --- | --- | --- | --- | --- | --- |
| Th/U | 207Pb/206Pb | | ±1σ | | | 207Pb/235U | | | ±1σ | | | 206Pb/238U | | | ±1σ | | | 207Pb/206Pb | | | ±1σ | | | 207Pb/235U | | | ±1σ | | | 206Pb/238U | | | ±1σ | | | discor. | | |
| **946-1, reddish sandstone from the Late Cretaceous Maodian Formation, Ganzhou, Jiangxi, China. 25°52'59.97"N, 114°47'21.14"E.** | | | | | | | | | | | | | | | | | | | | | | | | | | | | | | | | | | | | | | | |
| 90406_1_01 | 46.0 | | 0.07260 | | | 0.00080 | | | 1.65300 | | | 0.03100 | | | 0.16360 | | | 0.00220 | | | 999.0 | | | 23.0 | | | 988.0 | | | 12.0 | | | 976.0 | | | 12.0 | | | 1 | | |
| 90406_1_02 | 1.8 | | 0.16357 | | | 0.00080 | | | 10.37400 | | | 0.09500 | | | 0.45740 | | | 0.00450 | | | 2491.3 | | | 8.2 | | | 2467.5 | | | 8.5 | | | 2427.0 | | | 20.0 | | | 3 | | |
| 90406_1_03 | 0.8 | | 0.07420 | | | 0.00160 | | | 1.70300 | | | 0.05200 | | | 0.16420 | | | 0.00330 | | | 1041.0 | | | 43.0 | | | 1003.0 | | | 19.0 | | | 979.0 | | | 18.0 | | | 2 | | |
| 90406_1_04 | 1.1 | | 0.13380 | | | 0.00810 | | | 2.36000 | | | 0.20000 | | | 0.12490 | | | 0.00570 | | | 2050.0 | | | 110.0 | | | 1197.0 | | | 64.0 | | | 757.0 | | | 32.0 | | | 37 | | |
| 90406_1_05 | 2.2 | | 0.05622 | | | 0.00087 | | | 0.53970 | | | 0.00880 | | | 0.06942 | | | 0.00071 | | | 452.0 | | | 34.0 | | | 439.1 | | | 5.8 | | | 432.6 | | | 4.3 | | | 1 | | |
| 90406_1_06 | 1.7 | | 0.05630 | | | 0.00180 | | | 0.59300 | | | 0.02200 | | | 0.07530 | | | 0.00170 | | | 433.0 | | | 69.0 | | | 470.0 | | | 14.0 | | | 468.0 | | | 10.0 | | | 0 | | |
| 90406_1_07 | 1.2 | | 0.07035 | | | 0.00099 | | | 1.54100 | | | 0.02800 | | | 0.15730 | | | 0.00190 | | | 936.0 | | | 29.0 | | | 946.0 | | | 11.0 | | | 942.0 | | | 10.0 | | | 0 | | |
| 90406_1_08 | 1.8 | | 0.07220 | | | 0.00160 | | | 1.59900 | | | 0.04900 | | | 0.16020 | | | 0.00360 | | | 979.0 | | | 45.0 | | | 964.0 | | | 19.0 | | | 957.0 | | | 20.0 | | | 1 | | |
| 90406_1_09 | 2.1 | | 0.05681 | | | 0.00073 | | | 0.55950 | | | 0.00920 | | | 0.07121 | | | 0.00075 | | | 482.0 | | | 29.0 | | | 451.3 | | | 6.2 | | | 443.4 | | | 4.5 | | | 2 | | |
| 90406_1_10 | 5.1 | | 0.06400 | | | 0.00160 | | | 1.00700 | | | 0.03100 | | | 0.11330 | | | 0.00160 | | | 725.0 | | | 51.0 | | | 705.0 | | | 16.0 | | | 691.8 | | | 9.5 | | | 2 | | |
| 90406_1_11 | 1.2 | | 0.25570 | | | 0.00150 | | | 20.87000 | | | 0.29000 | | | 0.59020 | | | 0.00770 | | | 3219.9 | | | 9.4 | | | 3129.0 | | | 13.0 | | | 2987.0 | | | 31.0 | | | 8 | | |
| 90406_1_12 | 2.1 | | 0.05627 | | | 0.00085 | | | 0.51900 | | | 0.00880 | | | 0.06701 | | | 0.00073 | | | 450.0 | | | 34.0 | | | 423.9 | | | 5.8 | | | 418.0 | | | 4.4 | | | 1 | | |
| 90406_1_13 | 1.5 | | 0.05230 | | | 0.00140 | | | 0.14580 | | | 0.00400 | | | 0.02037 | | | 0.00023 | | | 282.0 | | | 61.0 | | | 138.1 | | | 3.5 | | | 130.0 | | | 1.4 | | | 6 | | |
| 90406_1_14 | 2.4 | | 0.05605 | | | 0.00096 | | | 0.53500 | | | 0.01100 | | | 0.06966 | | | 0.00084 | | | 450.0 | | | 40.0 | | | 434.4 | | | 7.3 | | | 434.1 | | | 5.1 | | | 0 | | |
| 90406_1_15 | 0.8 | | 0.06080 | | | 0.00210 | | | 0.57200 | | | 0.02000 | | | 0.06860 | | | 0.00100 | | | 604.0 | | | 73.0 | | | 458.0 | | | 13.0 | | | 427.4 | | | 6.1 | | | 7 | | |
| 90406_1_16 | 3.3 | | 0.06485 | | | 0.00098 | | | 0.96200 | | | 0.02200 | | | 0.10790 | | | 0.00160 | | | 760.0 | | | 31.0 | | | 682.0 | | | 11.0 | | | 660.5 | | | 9.3 | | | 3 | | |
| 90406_1_17 | 1.9 | | 0.05500 | | | 0.00150 | | | 0.52400 | | | 0.01500 | | | 0.06980 | | | 0.00110 | | | 377.0 | | | 58.0 | | | 428.0 | | | 10.0 | | | 434.9 | | | 6.6 | | | 2 | | |
| 90406_1_18 | 2.4 | | 0.05624 | | | 0.00090 | | | 0.53750 | | | 0.00920 | | | 0.06966 | | | 0.00064 | | | 447.0 | | | 35.0 | | | 436.1 | | | 6.1 | | | 434.0 | | | 3.8 | | | 0 | | |
| 90406_1_19 | 1.5 | | 0.05760 | | | 0.00210 | | | 0.57600 | | | 0.02500 | | | 0.07360 | | | 0.00190 | | | 466.0 | | | 82.0 | | | 460.0 | | | 16.0 | | | 458.0 | | | 12.0 | | | 0 | | |
| 90406_1_20 | 1.2 | | 0.05650 | | | 0.00120 | | | 0.51900 | | | 0.01300 | | | 0.06688 | | | 0.00090 | | | 448.0 | | | 47.0 | | | 423.2 | | | 8.4 | | | 417.3 | | | 5.4 | | | 1 | | |
| 90406_1_21 | 6.2 | | 0.08190 | | | 0.00140 | | | 1.98300 | | | 0.03100 | | | 0.17720 | | | 0.00210 | | | 1234.0 | | | 32.0 | | | 1109.0 | | | 10.0 | | | 1051.0 | | | 11.0 | | | 17 | | |
| 90406_1_22 | 0.8 | | 0.11220 | | | 0.00270 | | | 4.96000 | | | 0.22000 | | | 0.32700 | | | 0.01400 | | | 1811.0 | | | 45.0 | | | 1798.0 | | | 38.0 | | | 1818.0 | | | 67.0 | | | 0 | | |
| 90406_1_23 | 1.9 | | 0.07308 | | | 0.00094 | | | 1.59800 | | | 0.02600 | | | 0.15990 | | | 0.00220 | | | 1012.0 | | | 25.0 | | | 969.0 | | | 10.0 | | | 956.0 | | | 12.0 | | | 1 | | |
| 90406_1_24 | 2.3 | | 0.05980 | | | 0.00100 | | | 0.56800 | | | 0.01100 | | | 0.06910 | | | 0.00077 | | | 592.0 | | | 37.0 | | | 455.7 | | | 7.0 | | | 430.7 | | | 4.6 | | | 5 | | |
| 90406_1_25 | 1.4 | | 0.07880 | | | 0.00130 | | | 1.78400 | | | 0.03800 | | | 0.16480 | | | 0.00280 | | | 1156.0 | | | 32.0 | | | 1037.0 | | | 14.0 | | | 983.0 | | | 15.0 | | | 5 | | |
| 90406_1_26 | 2.1 | | 0.06590 | | | 0.00180 | | | 0.63500 | | | 0.01700 | | | 0.07025 | | | 0.00074 | | | 782.0 | | | 55.0 | | | 499.0 | | | 11.0 | | | 437.6 | | | 4.5 | | | 12 | | |
| 90406_1_27 | 1.5 | | 0.05620 | | | 0.00180 | | | 0.53300 | | | 0.02000 | | | 0.06940 | | | 0.00170 | | | 421.0 | | | 69.0 | | | 431.0 | | | 13.0 | | | 432.2 | | | 9.9 | | | 0 | | |
| 90406_1_28 | 1.7 | | 0.05790 | | | 0.00240 | | | 0.59400 | | | 0.03000 | | | 0.07480 | | | 0.00190 | | | 484.0 | | | 87.0 | | | 468.0 | | | 19.0 | | | 465.0 | | | 12.0 | | | 1 | | |
| 90406_1_29 | 0.7 | | 0.06350 | | | 0.00240 | | | 0.94100 | | | 0.05800 | | | 0.10780 | | | 0.00490 | | | 685.0 | | | 83.0 | | | 660.0 | | | 30.0 | | | 658.0 | | | 29.0 | | | 0 | | |
| 90406_1_30 | 0.9 | | 0.07100 | | | 0.00220 | | | 1.65400 | | | 0.07100 | | | 0.17100 | | | 0.00570 | | | 926.0 | | | 63.0 | | | 984.0 | | | 28.0 | | | 1015.0 | | | 32.0 | | | 3 | | |
| 90406_1_31 | 1.9 | | 0.05755 | | | 0.00087 | | | 0.53880 | | | 0.00920 | | | 0.06821 | | | 0.00069 | | | 506.0 | | | 34.0 | | | 437.0 | | | 6.0 | | | 425.3 | | | 4.2 | | | 3 | | |
| 90406_1_32 | 1.2 | | 0.15960 | | | 0.00130 | | | 8.85000 | | | 0.17000 | | | 0.40390 | | | 0.00650 | | | 2449.0 | | | 14.0 | | | 2318.0 | | | 17.0 | | | 2189.0 | | | 29.0 | | | 12 | | |
| 90406_1_33 | 0.3 | | 0.10680 | | | 0.00260 | | | 4.50000 | | | 0.19000 | | | 0.30600 | | | 0.01000 | | | 1724.0 | | | 45.0 | | | 1712.0 | | | 35.0 | | | 1716.0 | | | 51.0 | | | 0 | | |
| 90406_1_34 | 2.6 | | 0.11510 | | | 0.00110 | | | 5.21400 | | | 0.08500 | | | 0.33000 | | | 0.00470 | | | 1877.0 | | | 17.0 | | | 1854.0 | | | 13.0 | | | 1837.0 | | | 23.0 | | | 2 | | |
| 90406_1_35 | 1.2 | | 0.18640 | | | 0.00120 | | | 12.93000 | | | 0.18000 | | | 0.50570 | | | 0.00680 | | | 2708.0 | | | 11.0 | | | 2672.0 | | | 13.0 | | | 2636.0 | | | 29.0 | | | 3 | | |
| 90406_1_36 | 1.7 | | 0.06330 | | | 0.00110 | | | 0.61500 | | | 0.01300 | | | 0.07092 | | | 0.00085 | | | 710.0 | | | 35.0 | | | 486.6 | | | 8.4 | | | 441.6 | | | 5.1 | | | 9 | | |
| 90406_1_37 | 0.5 | | 0.06550 | | | 0.00150 | | | 1.10200 | | | 0.03300 | | | 0.12240 | | | 0.00250 | | | 779.0 | | | 50.0 | | | 753.0 | | | 15.0 | | | 744.0 | | | 15.0 | | | 1 | | |
| 90406_1_38 | 1.8 | | 0.05660 | | | 0.00110 | | | 0.52200 | | | 0.01200 | | | 0.06694 | | | 0.00094 | | | 459.0 | | | 43.0 | | | 425.4 | | | 7.9 | | | 417.6 | | | 5.7 | | | 2 | | |
| 90406_1_39 | 1.6 | | 0.07307 | | | 0.00088 | | | 1.62100 | | | 0.02800 | | | 0.16110 | | | 0.00200 | | | 1009.0 | | | 25.0 | | | 977.0 | | | 11.0 | | | 963.0 | | | 11.0 | | | 1 | | |
| 90406_1_40 | 5.9 | | 0.07000 | | | 0.00410 | | | 0.91000 | | | 0.10000 | | | 0.08740 | | | 0.00400 | | | 800.0 | | | 110.0 | | | 625.0 | | | 49.0 | | | 542.0 | | | 24.0 | | | 13 | | |
| 90406_1_41 | 0.9 | | 0.07660 | | | 0.00220 | | | 1.90100 | | | 0.07900 | | | 0.17970 | | | 0.00520 | | | 1091.0 | | | 58.0 | | | 1073.0 | | | 28.0 | | | 1063.0 | | | 28.0 | | | 3 | | |
| 90406_1_42 | 1.9 | | 0.05620 | | | 0.00100 | | | 0.55400 | | | 0.01100 | | | 0.07122 | | | 0.00094 | | | 450.0 | | | 43.0 | | | 447.6 | | | 7.7 | | | 443.4 | | | 5.6 | | | 1 | | |
| 90406_1_43 | 1.1 | | 0.06880 | | | 0.00150 | | | 1.31400 | | | 0.04000 | | | 0.13760 | | | 0.00290 | | | 872.0 | | | 45.0 | | | 848.0 | | | 17.0 | | | 833.0 | | | 17.0 | | | 2 | | |
| 90406_1_44 | 2.4 | | 0.06721 | | | 0.00087 | | | 1.27500 | | | 0.02000 | | | 0.13720 | | | 0.00150 | | | 836.0 | | | 27.0 | | | 833.4 | | | 9.1 | | | 828.6 | | | 8.8 | | | 1 | | |
| 90406_1_45 | 1.9 | | 0.05550 | | | 0.00160 | | | 0.50200 | | | 0.01500 | | | 0.06590 | | | 0.00130 | | | 407.0 | | | 64.0 | | | 413.0 | | | 10.0 | | | 411.0 | | | 7.7 | | | 0 | | |
| 90406_1_46 | 2.0 | | 0.05610 | | | 0.00100 | | | 0.57300 | | | 0.01100 | | | 0.07373 | | | 0.00095 | | | 439.0 | | | 42.0 | | | 459.4 | | | 7.1 | | | 458.5 | | | 5.7 | | | 0 | | |
| 90406_1_47 | 2.3 | | 0.05680 | | | 0.00130 | | | 0.54500 | | | 0.01400 | | | 0.06900 | | | 0.00110 | | | 460.0 | | | 50.0 | | | 440.4 | | | 9.2 | | | 430.0 | | | 6.6 | | | 2 | | |
| 90406_1_48 | 0.4 | | 0.07130 | | | 0.00180 | | | 1.61500 | | | 0.05100 | | | 0.16200 | | | 0.00360 | | | 953.0 | | | 53.0 | | | 970.0 | | | 20.0 | | | 967.0 | | | 20.0 | | | 0 | | |
| 90406_1_49 | 1.7 | | 0.05070 | | | 0.00160 | | | 0.17410 | | | 0.00540 | | | 0.02477 | | | 0.00027 | | | 197.0 | | | 65.0 | | | 162.6 | | | 4.7 | | | 157.7 | | | 1.7 | | | 3 | | |
| 90406_1_50 | 1.8 | | 0.06280 | | | 0.00300 | | | 1.13700 | | | 0.05900 | | | 0.13170 | | | 0.00510 | | | 610.0 | | | 100.0 | | | 759.0 | | | 28.0 | | | 796.0 | | | 29.0 | | | 5 | | |
| 90406_1_51 | 1.7 | | 0.07100 | | | 0.00140 | | | 1.66300 | | | 0.04500 | | | 0.16880 | | | 0.00360 | | | 940.0 | | | 42.0 | | | 992.0 | | | 17.0 | | | 1005.0 | | | 20.0 | | | 1 | | |
| 90406_1_52 | 2.2 | | 0.05670 | | | 0.00110 | | | 0.54600 | | | 0.01200 | | | 0.06932 | | | 0.00094 | | | 461.0 | | | 45.0 | | | 441.1 | | | 8.1 | | | 432.0 | | | 5.6 | | | 2 | | |
| 90406_1_53 | 3.0 | | 0.05638 | | | 0.00082 | | | 0.57500 | | | 0.01100 | | | 0.07359 | | | 0.00092 | | | 456.0 | | | 33.0 | | | 460.5 | | | 7.0 | | | 457.7 | | | 5.5 | | | 1 | | |
| 90406_1_54 | 1.4 | | 0.05500 | | | 0.00210 | | | 0.51000 | | | 0.02200 | | | 0.06750 | | | 0.00140 | | | 361.0 | | | 84.0 | | | 417.0 | | | 15.0 | | | 420.6 | | | 8.6 | | | 1 | | |
| 90406_1_55 | 2.7 | | 0.05800 | | | 0.00120 | | | 0.56500 | | | 0.01500 | | | 0.07070 | | | 0.00120 | | | 509.0 | | | 47.0 | | | 453.2 | | | 9.5 | | | 440.5 | | | 7.1 | | | 3 | | |
| 90406_1_56 | 3.1 | | 0.05510 | | | 0.00160 | | | 0.52400 | | | 0.01800 | | | 0.06870 | | | 0.00120 | | | 380.0 | | | 63.0 | | | 426.0 | | | 12.0 | | | 428.4 | | | 7.0 | | | 1 | | |
| 90406_1_57 | 2.0 | | 0.06140 | | | 0.00190 | | | 0.60400 | | | 0.02000 | | | 0.07104 | | | 0.00079 | | | 630.0 | | | 65.0 | | | 477.0 | | | 12.0 | | | 442.4 | | | 4.8 | | | 7 | | |
| 90406_1_58 | 1.3 | | 0.07060 | | | 0.00120 | | | 1.44800 | | | 0.03100 | | | 0.14980 | | | 0.00240 | | | 943.0 | | | 33.0 | | | 908.0 | | | 13.0 | | | 900.0 | | | 14.0 | | | 1 | | |
| 90406_1_59 | 1.9 | | 0.06440 | | | 0.00110 | | | 0.57600 | | | 0.01100 | | | 0.06522 | | | 0.00086 | | | 746.0 | | | 37.0 | | | 461.0 | | | 6.9 | | | 407.2 | | | 5.2 | | | 12 | | |
| 90406_1_60 | 4.1 | | 0.11345 | | | 0.00086 | | | 5.02800 | | | 0.06900 | | | 0.32340 | | | 0.00410 | | | 1853.0 | | | 14.0 | | | 1822.0 | | | 12.0 | | | 1805.0 | | | 20.0 | | | 3 | | |
| 90406_1_61 | 1.8 | | 0.05030 | | | 0.00220 | | | 0.25800 | | | 0.01200 | | | 0.03765 | | | 0.00075 | | | 167.0 | | | 92.0 | | | 231.7 | | | 9.5 | | | 238.2 | | | 4.7 | | | 3 | | |
| 90406_1_62 | 2.1 | | 0.05572 | | | 0.00097 | | | 0.52600 | | | 0.01000 | | | 0.06913 | | | 0.00081 | | | 426.0 | | | 39.0 | | | 428.7 | | | 6.9 | | | 430.8 | | | 4.9 | | | 0 | | |
| 90406_1_63 | 1.4 | | 0.14540 | | | 0.00720 | | | 1.66000 | | | 0.11000 | | | 0.08350 | | | 0.00270 | | | 2282.0 | | | 81.0 | | | 976.0 | | | 34.0 | | | 516.0 | | | 16.0 | | | 47 | | |
| 90406_1_64 | 1.2 | | 0.07550 | | | 0.00180 | | | 1.90400 | | | 0.06000 | | | 0.18400 | | | 0.00420 | | | 1064.0 | | | 50.0 | | | 1076.0 | | | 20.0 | | | 1087.0 | | | 23.0 | | | 2 | | |
| 90406_1_65 | 1.7 | | 0.06040 | | | 0.00130 | | | 0.58100 | | | 0.01400 | | | 0.07023 | | | 0.00097 | | | 597.0 | | | 46.0 | | | 464.1 | | | 8.7 | | | 437.5 | | | 5.8 | | | 6 | | |
| 90406_1_66 | 2.4 | | 0.05650 | | | 0.00130 | | | 0.54500 | | | 0.01500 | | | 0.07040 | | | 0.00110 | | | 449.0 | | | 49.0 | | | 440.5 | | | 9.7 | | | 438.6 | | | 6.8 | | | 0 | | |
| 90406_1_67 | 0.6 | | 0.20330 | | | 0.00250 | | | 15.84000 | | | 0.41000 | | | 0.56700 | | | 0.01400 | | | 2850.0 | | | 19.0 | | | 2857.0 | | | 25.0 | | | 2889.0 | | | 57.0 | | | 1 | | |
| 90406_1_68 | 62.1 | | 0.07069 | | | 0.00077 | | | 1.56500 | | | 0.02400 | | | 0.16140 | | | 0.00200 | | | 943.0 | | | 22.0 | | | 954.9 | | | 9.5 | | | 964.0 | | | 11.0 | | | 1 | | |
| 90406_1_69 | 8.9 | | 0.09845 | | | 0.00097 | | | 3.67800 | | | 0.06000 | | | 0.27230 | | | 0.00420 | | | 1591.0 | | | 18.0 | | | 1564.0 | | | 13.0 | | | 1552.0 | | | 21.0 | | | 3 | | |
| 90406_1_70 | 2.4 | | 0.05520 | | | 0.00190 | | | 0.48300 | | | 0.01900 | | | 0.06370 | | | 0.00140 | | | 381.0 | | | 73.0 | | | 397.0 | | | 13.0 | | | 398.0 | | | 8.6 | | | 0 | | |
| 90406_1_71 | 2.8 | | 0.06990 | | | 0.00150 | | | 0.68600 | | | 0.01500 | | | 0.07122 | | | 0.00088 | | | 908.0 | | | 42.0 | | | 528.9 | | | 8.9 | | | 443.4 | | | 5.3 | | | 16 | | |
| 90406_1_72 | 1.4 | | 0.05420 | | | 0.00340 | | | 0.21600 | | | 0.01400 | | | 0.02899 | | | 0.00076 | | | 270.0 | | | 130.0 | | | 196.0 | | | 12.0 | | | 184.2 | | | 4.8 | | | 6 | | |
| 90406_1_73 | 2.0 | | 0.05500 | | | 0.00120 | | | 0.54200 | | | 0.01300 | | | 0.07130 | | | 0.00100 | | | 392.0 | | | 48.0 | | | 438.2 | | | 8.8 | | | 444.1 | | | 6.0 | | | 1 | | |
| 90406_1_74 | 7.2 | | 0.07240 | | | 0.00086 | | | 1.65900 | | | 0.02500 | | | 0.16580 | | | 0.00180 | | | 990.0 | | | 24.0 | | | 991.5 | | | 9.5 | | | 989.0 | | | 10.0 | | | 0 | | |
| 90406_1_75 | 1.1 | | 0.15860 | | | 0.00170 | | | 9.40000 | | | 0.20000 | | | 0.43210 | | | 0.00930 | | | 2436.0 | | | 18.0 | | | 2377.0 | | | 21.0 | | | 2311.0 | | | 42.0 | | | 5 | | |
| 90406_1_76 | 1.1 | | 0.07400 | | | 0.00150 | | | 1.67200 | | | 0.04700 | | | 0.16300 | | | 0.00300 | | | 1025.0 | | | 40.0 | | | 993.0 | | | 18.0 | | | 973.0 | | | 17.0 | | | 2 | | |
| 90406_1_77 | 1.9 | | 0.05630 | | | 0.00100 | | | 0.52800 | | | 0.01100 | | | 0.06808 | | | 0.00086 | | | 449.0 | | | 42.0 | | | 429.8 | | | 7.0 | | | 424.5 | | | 5.2 | | | 1 | | |
| 90406_1_78 | 1.1 | | 0.06340 | | | 0.00160 | | | 1.09600 | | | 0.03300 | | | 0.12590 | | | 0.00260 | | | 700.0 | | | 54.0 | | | 747.0 | | | 16.0 | | | 764.0 | | | 15.0 | | | 2 | | |
| 90406_1_79 | 1.9 | | 0.07070 | | | 0.00150 | | | 1.62600 | | | 0.04400 | | | 0.16570 | | | 0.00300 | | | 948.0 | | | 44.0 | | | 979.0 | | | 16.0 | | | 990.0 | | | 17.0 | | | 1 | | |
| 90406_1_80 | 1.9 | | 0.05713 | | | 0.00085 | | | 0.55500 | | | 0.01000 | | | 0.07023 | | | 0.00076 | | | 485.0 | | | 33.0 | | | 447.7 | | | 6.6 | | | 437.5 | | | 4.5 | | | 2 | | |
| 90406_1_81 | 1.1 | | 0.04750 | | | 0.00390 | | | 0.14800 | | | 0.01200 | | | 0.02311 | | | 0.00067 | | | 0.0 | | | 150.0 | | | 138.0 | | | 11.0 | | | 147.2 | | | 4.2 | | | 7 | | |
| 90406_1_82 | 1.8 | | 0.11530 | | | 0.00210 | | | 5.49000 | | | 0.19000 | | | 0.34500 | | | 0.01100 | | | 1879.0 | | | 31.0 | | | 1894.0 | | | 30.0 | | | 1906.0 | | | 51.0 | | | 1 | | |
| 90406_1_83 | 1.8 | | 0.05650 | | | 0.00170 | | | 0.53300 | | | 0.01700 | | | 0.06880 | | | 0.00120 | | | 434.0 | | | 64.0 | | | 434.0 | | | 11.0 | | | 429.0 | | | 7.4 | | | 1 | | |
| 90406_1_84 | 3.1 | | 0.05710 | | | 0.00100 | | | 0.54800 | | | 0.01200 | | | 0.06891 | | | 0.00092 | | | 480.0 | | | 40.0 | | | 442.9 | | | 7.5 | | | 429.5 | | | 5.5 | | | 3 | | |
| 90406_1_85 | 1.1 | | 0.12400 | | | 0.00150 | | | 0.88900 | | | 0.01200 | | | 0.05163 | | | 0.00069 | | | 2009.0 | | | 21.0 | | | 645.1 | | | 6.5 | | | 324.5 | | | 4.2 | | | 50 | | |
| 90406_1_86 | 2.8 | | 0.05590 | | | 0.00094 | | | 0.53500 | | | 0.01000 | | | 0.06884 | | | 0.00073 | | | 434.0 | | | 38.0 | | | 434.5 | | | 6.7 | | | 429.1 | | | 4.4 | | | 1 | | |
| 90406_1_87 | 1.0 | | 0.09700 | | | 0.00190 | | | 3.59000 | | | 0.11000 | | | 0.26620 | | | 0.00710 | | | 1553.0 | | | 37.0 | | | 1539.0 | | | 24.0 | | | 1518.0 | | | 36.0 | | | 2 | | |
| 90406_1_88 | 1.5 | | 0.11270 | | | 0.00110 | | | 5.08300 | | | 0.07600 | | | 0.32440 | | | 0.00430 | | | 1845.0 | | | 18.0 | | | 1831.0 | | | 13.0 | | | 1810.0 | | | 21.0 | | | 2 | | |
| 90406_1_89 | 1.7 | | 0.05540 | | | 0.00120 | | | 0.53000 | | | 0.01500 | | | 0.06860 | | | 0.00110 | | | 413.0 | | | 50.0 | | | 430.2 | | | 9.8 | | | 427.3 | | | 6.8 | | | 1 | | |
| 90406_1_90 | 0.9 | | 0.09870 | | | 0.00200 | | | 3.72000 | | | 0.12000 | | | 0.27100 | | | 0.00680 | | | 1584.0 | | | 37.0 | | | 1570.0 | | | 25.0 | | | 1543.0 | | | 34.0 | | | 3 | | |
| **946-2, reddish sandstone from the Late Cretaceous Maodian Formation, Ganzhou, Jiangxi, China. 25°52'59.29"N, 114°47'20.85"E.** | | | | | | | | | | | | | | | | | | | | | | | | | | | | | | | | | | | | | | | | | |
| 90406-2-01 | 3.4 | | 0.06230 | | | 0.00120 | | | 0.60500 | | | 0.02100 | | | 0.06670 | | | 0.00130 | | | 670.0 | | | 43.0 | | | 477.0 | | | 13.0 | | | 416.0 | | | 7.9 | | | 13 | | |
| 90406-2-02 | 7.7 | | 0.05900 | | | 0.00110 | | | 0.62700 | | | 0.02500 | | | 0.07900 | | | 0.00140 | | | 564.0 | | | 40.0 | | | 491.0 | | | 15.0 | | | 490.1 | | | 8.6 | | | 0 | | |
| 90406-2-03 | 2.0 | | 0.05670 | | | 0.00110 | | | 0.56500 | | | 0.01400 | | | 0.07350 | | | 0.00140 | | | 466.0 | | | 46.0 | | | 453.5 | | | 9.1 | | | 456.8 | | | 8.3 | | | 1 | | |
| 90406-2-04 | 5.8 | | 0.05530 | | | 0.00110 | | | 0.53300 | | | 0.01400 | | | 0.06880 | | | 0.00120 | | | 408.0 | | | 47.0 | | | 432.6 | | | 9.1 | | | 428.8 | | | 7.3 | | | 1 | | |
| 90406-2-05 | 1.8 | | 0.05650 | | | 0.00120 | | | 0.54400 | | | 0.01600 | | | 0.07030 | | | 0.00140 | | | 465.0 | | | 48.0 | | | 440.0 | | | 11.0 | | | 437.6 | | | 8.2 | | | 1 | | |
| 90406-2-06 | 6.9 | | 0.06050 | | | 0.00067 | | | 0.71300 | | | 0.01500 | | | 0.08640 | | | 0.00140 | | | 620.0 | | | 24.0 | | | 545.2 | | | 9.2 | | | 534.1 | | | 8.0 | | | 2 | | |
| 90406-2-07 | 1.9 | | 0.05669 | | | 0.00079 | | | 0.55300 | | | 0.01100 | | | 0.07010 | | | 0.00110 | | | 468.0 | | | 31.0 | | | 446.4 | | | 7.2 | | | 436.6 | | | 6.6 | | | 2 | | |
| 90406-2-08 | 1.4 | | 0.07291 | | | 0.00095 | | | 1.54300 | | | 0.02900 | | | 0.15460 | | | 0.00310 | | | 1006.0 | | | 27.0 | | | 947.0 | | | 12.0 | | | 926.0 | | | 17.0 | | | 2 | | |
| 90406-2-09 | 1.2 | | 0.07280 | | | 0.00110 | | | 1.54700 | | | 0.04200 | | | 0.15550 | | | 0.00290 | | | 998.0 | | | 30.0 | | | 946.0 | | | 17.0 | | | 931.0 | | | 16.0 | | | 2 | | |
| 90406-2-10 | 2.0 | | 0.05771 | | | 0.00094 | | | 0.57800 | | | 0.01400 | | | 0.07290 | | | 0.00130 | | | 505.0 | | | 35.0 | | | 462.1 | | | 8.7 | | | 453.4 | | | 7.9 | | | 2 | | |
| 90406-2-11 | 3.5 | | 0.05724 | | | 0.00088 | | | 0.56200 | | | 0.01500 | | | 0.07230 | | | 0.00110 | | | 499.0 | | | 36.0 | | | 451.4 | | | 9.8 | | | 450.1 | | | 6.5 | | | 0 | | |
| 90406-2-12 | 2.0 | | 0.05684 | | | 0.00079 | | | 0.56700 | | | 0.01300 | | | 0.07250 | | | 0.00110 | | | 478.0 | | | 32.0 | | | 454.8 | | | 8.4 | | | 450.9 | | | 6.4 | | | 1 | | |
| 90406-2-13 | 8.6 | | 0.11540 | | | 0.00100 | | | 5.78000 | | | 0.11000 | | | 0.36070 | | | 0.00690 | | | 1882.0 | | | 16.0 | | | 1939.0 | | | 17.0 | | | 1983.0 | | | 32.0 | | | 2 | | |
| 90406-2-13 | 8.7 | | 0.11560 | | | 0.00100 | | | 5.77000 | | | 0.11000 | | | 0.36080 | | | 0.00670 | | | 1885.0 | | | 16.0 | | | 1937.0 | | | 17.0 | | | 1983.0 | | | 32.0 | | | 2 | | |
| 90406-2-14 | 1.8 | | 0.15550 | | | 0.00130 | | | 9.73000 | | | 0.23000 | | | 0.43560 | | | 0.00960 | | | 2405.0 | | | 14.0 | | | 2403.0 | | | 21.0 | | | 2325.0 | | | 43.0 | | | 3 | | |
| 90406-2-15 | 0.9 | | 0.16220 | | | 0.00150 | | | 10.80000 | | | 0.25000 | | | 0.47930 | | | 0.00950 | | | 2476.0 | | | 15.0 | | | 2505.0 | | | 23.0 | | | 2519.0 | | | 42.0 | | | 1 | | |
| 90406-2-16 | 2.0 | | 0.05810 | | | 0.00110 | | | 0.57400 | | | 0.01500 | | | 0.07340 | | | 0.00130 | | | 516.0 | | | 41.0 | | | 459.1 | | | 9.4 | | | 456.2 | | | 7.9 | | | 1 | | |
| 90406-2-17 | 2.3 | | 0.05640 | | | 0.00100 | | | 0.55900 | | | 0.01300 | | | 0.07310 | | | 0.00140 | | | 452.0 | | | 40.0 | | | 450.6 | | | 8.8 | | | 454.8 | | | 8.5 | | | 1 | | |
| 90406-2-18 | 2.1 | | 0.05780 | | | 0.00130 | | | 0.58400 | | | 0.01400 | | | 0.07580 | | | 0.00130 | | | 495.0 | | | 46.0 | | | 467.0 | | | 9.3 | | | 471.0 | | | 7.8 | | | 1 | | |
| 90406-2-19 | 1.1 | | 0.05950 | | | 0.00200 | | | 0.59000 | | | 0.02100 | | | 0.07380 | | | 0.00170 | | | 546.0 | | | 70.0 | | | 468.0 | | | 14.0 | | | 459.0 | | | 10.0 | | | 2 | | |
| 90406-2-20 | 0.9 | | 0.06970 | | | 0.00170 | | | 1.20600 | | | 0.03500 | | | 0.12700 | | | 0.00260 | | | 908.0 | | | 53.0 | | | 801.0 | | | 16.0 | | | 770.0 | | | 15.0 | | | 4 | | |
| 90406-2-21 | 1.6 | | 0.05490 | | | 0.00160 | | | 0.52300 | | | 0.01600 | | | 0.06720 | | | 0.00150 | | | 394.0 | | | 65.0 | | | 426.0 | | | 10.0 | | | 419.1 | | | 8.9 | | | 2 | | |
| 90406-2-22 | 1.9 | | 0.05570 | | | 0.00140 | | | 0.57200 | | | 0.01800 | | | 0.07370 | | | 0.00140 | | | 416.0 | | | 57.0 | | | 457.0 | | | 12.0 | | | 458.3 | | | 8.4 | | | 0 | | |
| 90406-2-23 | 5.4 | | 0.05630 | | | 0.00099 | | | 0.54400 | | | 0.01400 | | | 0.06910 | | | 0.00120 | | | 445.0 | | | 39.0 | | | 439.8 | | | 8.9 | | | 430.6 | | | 7.4 | | | 2 | | |
| 90406-2-24 | 2.2 | | 0.05620 | | | 0.00110 | | | 0.56800 | | | 0.01600 | | | 0.07280 | | | 0.00110 | | | 439.0 | | | 42.0 | | | 454.0 | | | 10.0 | | | 452.7 | | | 6.9 | | | 0 | | |
| 90406-2-25 | 1.3 | | 0.14500 | | | 0.00130 | | | 4.17000 | | | 0.10000 | | | 0.19040 | | | 0.00290 | | | 2288.0 | | | 14.0 | | | 1663.0 | | | 20.0 | | | 1123.0 | | | 15.0 | | | 32 | | |
| 90406-2-26 | 1.1 | | 0.05770 | | | 0.00120 | | | 0.62600 | | | 0.01700 | | | 0.07720 | | | 0.00150 | | | 500.0 | | | 47.0 | | | 492.0 | | | 10.0 | | | 479.4 | | | 8.8 | | | 3 | | |
| 90406-2-27 | 0.8 | | 0.05280 | | | 0.00140 | | | 0.30250 | | | 0.00840 | | | 0.04166 | | | 0.00070 | | | 303.0 | | | 61.0 | | | 269.2 | | | 6.5 | | | 263.1 | | | 4.3 | | | 2 | | |
| 90406-2-28 | 1.6 | | 0.07302 | | | 0.00095 | | | 1.62700 | | | 0.03600 | | | 0.16540 | | | 0.00290 | | | 1006.0 | | | 27.0 | | | 982.0 | | | 15.0 | | | 986.0 | | | 16.0 | | | 0 | | |
| 90406-2-29 | 2.1 | | 0.05770 | | | 0.00120 | | | 0.56900 | | | 0.01400 | | | 0.07140 | | | 0.00130 | | | 495.0 | | | 45.0 | | | 455.7 | | | 9.2 | | | 444.1 | | | 7.6 | | | 3 | | |
| 90406-2-30 | 1.3 | | 0.07330 | | | 0.00150 | | | 1.64300 | | | 0.05900 | | | 0.15860 | | | 0.00370 | | | 1007.0 | | | 39.0 | | | 983.0 | | | 22.0 | | | 948.0 | | | 21.0 | | | 4 | | |
| 90406-2-31 | 1.7 | | 0.07270 | | | 0.00120 | | | 1.77900 | | | 0.04700 | | | 0.18210 | | | 0.00560 | | | 997.0 | | | 34.0 | | | 1033.0 | | | 17.0 | | | 1076.0 | | | 30.0 | | | 4 | | |
| 90406-2-32 | 2.4 | | 0.06040 | | | 0.00260 | | | 0.62700 | | | 0.02600 | | | 0.07420 | | | 0.00180 | | | 545.0 | | | 75.0 | | | 490.0 | | | 16.0 | | | 461.0 | | | 11.0 | | | 6 | | |
| 90406-2-33 | 1.1 | | 0.16180 | | | 0.00160 | | | 10.23000 | | | 0.27000 | | | 0.45800 | | | 0.01200 | | | 2473.0 | | | 16.0 | | | 2447.0 | | | 24.0 | | | 2426.0 | | | 51.0 | | | 1 | | |
| 90406-2-34 | 2.5 | | 0.07424 | | | 0.00097 | | | 1.71600 | | | 0.03700 | | | 0.16930 | | | 0.00310 | | | 1038.0 | | | 27.0 | | | 1011.0 | | | 14.0 | | | 1007.0 | | | 17.0 | | | 0 | | |
| 90406-2-35 | 1.7 | | 0.05580 | | | 0.00220 | | | 0.54400 | | | 0.02300 | | | 0.07050 | | | 0.00190 | | | 396.0 | | | 87.0 | | | 437.0 | | | 15.0 | | | 439.0 | | | 11.0 | | | 0 | | |
| 90406-2-36 | 2.3 | | 0.05540 | | | 0.00120 | | | 0.54500 | | | 0.01400 | | | 0.07170 | | | 0.00130 | | | 404.0 | | | 49.0 | | | 441.7 | | | 9.8 | | | 446.0 | | | 7.8 | | | 1 | | |
| 90406-2-37 | 1.7 | | 0.06550 | | | 0.00110 | | | 0.61700 | | | 0.01700 | | | 0.06690 | | | 0.00120 | | | 782.0 | | | 37.0 | | | 486.0 | | | 10.0 | | | 417.1 | | | 7.4 | | | 14 | | |
| 90406-2-38 | 1.7 | | 0.07350 | | | 0.00140 | | | 1.78800 | | | 0.05800 | | | 0.17480 | | | 0.00410 | | | 1011.0 | | | 39.0 | | | 1037.0 | | | 22.0 | | | 1037.0 | | | 22.0 | | | 0 | | |
| 90406-2-39 | 2.3 | | 0.06330 | | | 0.00160 | | | 0.62900 | | | 0.01400 | | | 0.07390 | | | 0.00130 | | | 695.0 | | | 54.0 | | | 494.2 | | | 8.6 | | | 459.6 | | | 7.5 | | | 7 | | |
| 90406-2-40 | 3.3 | | 0.05690 | | | 0.00110 | | | 0.60800 | | | 0.01700 | | | 0.07590 | | | 0.00160 | | | 476.0 | | | 44.0 | | | 481.0 | | | 11.0 | | | 471.5 | | | 9.4 | | | 2 | | |
| 90406-2-41 | 1.1 | | 0.06830 | | | 0.00130 | | | 0.68800 | | | 0.01400 | | | 0.07280 | | | 0.00120 | | | 860.0 | | | 38.0 | | | 530.1 | | | 8.3 | | | 452.6 | | | 6.9 | | | 15 | | |
| 90406-2-42 | 1.1 | | 0.05670 | | | 0.00190 | | | 0.52600 | | | 0.02000 | | | 0.06590 | | | 0.00160 | | | 442.0 | | | 75.0 | | | 426.0 | | | 13.0 | | | 411.1 | | | 9.6 | | | 3 | | |
| 90406-2-43 | 4.1 | | 0.05644 | | | 0.00097 | | | 0.52800 | | | 0.01300 | | | 0.07060 | | | 0.00110 | | | 454.0 | | | 38.0 | | | 430.0 | | | 9.0 | | | 439.8 | | | 6.5 | | | 2 | | |
| 90406-2-44 | 1.5 | | 0.06689 | | | 0.00090 | | | 0.63900 | | | 0.01100 | | | 0.06560 | | | 0.00110 | | | 831.0 | | | 27.0 | | | 501.3 | | | 6.7 | | | 409.4 | | | 6.8 | | | 18 | | |
| 90406-2-45 | 1.1 | | 0.07330 | | | 0.00130 | | | 1.72300 | | | 0.05100 | | | 0.16790 | | | 0.00310 | | | 1009.0 | | | 35.0 | | | 1012.0 | | | 19.0 | | | 1000.0 | | | 17.0 | | | 1 | | |
| 90406-2-46 | 1.4 | | 0.05590 | | | 0.00110 | | | 0.53800 | | | 0.01400 | | | 0.06960 | | | 0.00120 | | | 436.0 | | | 41.0 | | | 435.7 | | | 9.0 | | | 433.5 | | | 7.4 | | | 1 | | |
| 90406-2-47 | 2.1 | | 0.05650 | | | 0.00160 | | | 0.53800 | | | 0.01900 | | | 0.06780 | | | 0.00200 | | | 444.0 | | | 63.0 | | | 435.0 | | | 13.0 | | | 423.0 | | | 12.0 | | | 3 | | |
| 90406-2-48 | 0.9 | | 0.07110 | | | 0.00110 | | | 1.47600 | | | 0.03800 | | | 0.15310 | | | 0.00310 | | | 949.0 | | | 33.0 | | | 920.0 | | | 16.0 | | | 918.0 | | | 17.0 | | | 0 | | |
| 90406-2-49 | 1.2 | | 0.09350 | | | 0.00120 | | | 3.57000 | | | 0.10000 | | | 0.27370 | | | 0.00570 | | | 1491.0 | | | 23.0 | | | 1537.0 | | | 23.0 | | | 1557.0 | | | 29.0 | | | 1 | | |
| 90406-2-50 | 2.4 | | 0.07220 | | | 0.00100 | | | 1.67900 | | | 0.03800 | | | 0.16450 | | | 0.00280 | | | 980.0 | | | 30.0 | | | 997.0 | | | 14.0 | | | 981.0 | | | 16.0 | | | 2 | | |
| 90406-2-51 | 4.1 | | 0.06330 | | | 0.00180 | | | 0.85500 | | | 0.02500 | | | 0.09720 | | | 0.00230 | | | 683.0 | | | 59.0 | | | 625.0 | | | 14.0 | | | 597.0 | | | 13.0 | | | 4 | | |
| 90406-2-52 | 1.6 | | 0.06290 | | | 0.00130 | | | 0.61300 | | | 0.01700 | | | 0.06950 | | | 0.00130 | | | 684.0 | | | 46.0 | | | 483.0 | | | 10.0 | | | 433.0 | | | 8.0 | | | 10 | | |
| 90406-2-53 | 2.1 | | 0.12940 | | | 0.00190 | | | 1.77600 | | | 0.04200 | | | 0.09550 | | | 0.00180 | | | 2082.0 | | | 26.0 | | | 1033.0 | | | 15.0 | | | 588.0 | | | 10.0 | | | 43 | | |
| 90406-2-54 | 1.0 | | 0.05670 | | | 0.00110 | | | 0.54200 | | | 0.01500 | | | 0.06810 | | | 0.00170 | | | 464.0 | | | 44.0 | | | 439.6 | | | 9.5 | | | 424.5 | | | 9.9 | | | 3 | | |
| 90406-2-55 | 1.0 | | 0.07480 | | | 0.00110 | | | 1.55200 | | | 0.04000 | | | 0.16940 | | | 0.00390 | | | 1059.0 | | | 29.0 | | | 949.0 | | | 16.0 | | | 1008.0 | | | 22.0 | | | 6 | | |
| 90406-2-56 | 3.2 | | 0.05740 | | | 0.00110 | | | 0.55700 | | | 0.01100 | | | 0.07100 | | | 0.00130 | | | 489.0 | | | 39.0 | | | 448.9 | | | 6.9 | | | 441.8 | | | 7.7 | | | 2 | | |
| 90406-2-57 | 1.4 | | 0.05640 | | | 0.00150 | | | 0.55600 | | | 0.01900 | | | 0.07110 | | | 0.00160 | | | 437.0 | | | 60.0 | | | 446.0 | | | 12.0 | | | 442.4 | | | 9.3 | | | 1 | | |
| 90406-2-58 | 1.1 | | 0.05600 | | | 0.00160 | | | 0.57600 | | | 0.01700 | | | 0.06970 | | | 0.00160 | | | 432.0 | | | 64.0 | | | 460.0 | | | 11.0 | | | 434.0 | | | 9.8 | | | 6 | | |
| 90406-2-59 | 2.1 | | 0.05660 | | | 0.00110 | | | 0.57400 | | | 0.01800 | | | 0.07290 | | | 0.00130 | | | 460.0 | | | 42.0 | | | 458.0 | | | 11.0 | | | 453.7 | | | 7.6 | | | 1 | | |
| 90406-2-60 | 2.7 | | 0.06010 | | | 0.00120 | | | 0.74900 | | | 0.03400 | | | 0.08690 | | | 0.00210 | | | 587.0 | | | 42.0 | | | 559.0 | | | 20.0 | | | 537.0 | | | 12.0 | | | 4 | | |
| 90406-2-61 | 2.2 | | 0.06690 | | | 0.00120 | | | 0.64200 | | | 0.01000 | | | 0.07300 | | | 0.00110 | | | 826.0 | | | 38.0 | | | 503.6 | | | 6.6 | | | 455.0 | | | 6.6 | | | 10 | | |
| 90406-2-62 | 1.2 | | 0.05550 | | | 0.00160 | | | 0.56500 | | | 0.02000 | | | 0.07400 | | | 0.00170 | | | 406.0 | | | 64.0 | | | 454.0 | | | 13.0 | | | 460.0 | | | 10.0 | | | 1 | | |
| 90406-2-63 | 0.8 | | 0.11380 | | | 0.00150 | | | 5.29000 | | | 0.17000 | | | 0.32670 | | | 0.00890 | | | 1853.0 | | | 23.0 | | | 1855.0 | | | 26.0 | | | 1817.0 | | | 43.0 | | | 2 | | |
| 90406-2-64 | 1.2 | | 0.05840 | | | 0.00170 | | | 0.57600 | | | 0.01700 | | | 0.07130 | | | 0.00140 | | | 527.0 | | | 62.0 | | | 461.0 | | | 11.0 | | | 443.7 | | | 8.6 | | | 4 | | |
| 90406-2-65 | 1.1 | | 0.06630 | | | 0.00140 | | | 1.31400 | | | 0.04100 | | | 0.14490 | | | 0.00380 | | | 800.0 | | | 43.0 | | | 849.0 | | | 18.0 | | | 871.0 | | | 21.0 | | | 3 | | |
| 90406-2-66 | 2.0 | | 0.05850 | | | 0.00110 | | | 0.57000 | | | 0.01200 | | | 0.07220 | | | 0.00140 | | | 530.0 | | | 40.0 | | | 457.2 | | | 7.9 | | | 449.2 | | | 8.3 | | | 2 | | |
| 90406-2-67 | 0.5 | | 0.06170 | | | 0.00200 | | | 0.82700 | | | 0.03000 | | | 0.09580 | | | 0.00260 | | | 613.0 | | | 67.0 | | | 607.0 | | | 17.0 | | | 589.0 | | | 15.0 | | | 3 | | |
| 90406-2-68 | 0.4 | | 0.05694 | | | 0.00091 | | | 0.54100 | | | 0.01100 | | | 0.06950 | | | 0.00120 | | | 484.0 | | | 35.0 | | | 439.3 | | | 7.6 | | | 433.1 | | | 7.2 | | | 1 | | |
| 90406-2-69 | 7.8 | | 0.06851 | | | 0.00083 | | | 1.15800 | | | 0.03300 | | | 0.11350 | | | 0.00230 | | | 881.0 | | | 26.0 | | | 777.0 | | | 16.0 | | | 693.0 | | | 13.0 | | | 11 | | |
| 90406-2-70 | 0.8 | | 0.08620 | | | 0.00220 | | | 0.76100 | | | 0.01700 | | | 0.06400 | | | 0.00110 | | | 1317.0 | | | 50.0 | | | 574.1 | | | 9.3 | | | 399.5 | | | 6.6 | | | 30 | | |
| 90406-2-71 | 1.4 | | 0.05790 | | | 0.00190 | | | 0.57200 | | | 0.02000 | | | 0.07330 | | | 0.00160 | | | 477.0 | | | 69.0 | | | 458.0 | | | 13.0 | | | 455.5 | | | 9.3 | | | 1 | | |
| 90406-2-72 | 7.2 | | 0.05762 | | | 0.00070 | | | 0.58400 | | | 0.01000 | | | 0.07400 | | | 0.00110 | | | 507.0 | | | 27.0 | | | 466.3 | | | 6.6 | | | 460.1 | | | 6.4 | | | 1 | | |
| 90406-2-73 | 122.9 | | 0.06100 | | | 0.00180 | | | 0.60400 | | | 0.01700 | | | 0.07250 | | | 0.00120 | | | 604.0 | | | 62.0 | | | 478.0 | | | 11.0 | | | 451.1 | | | 7.2 | | | 6 | | |
| 90406-2-74 | 1.5 | | 0.05640 | | | 0.00190 | | | 0.56000 | | | 0.02300 | | | 0.07210 | | | 0.00190 | | | 461.0 | | | 81.0 | | | 448.0 | | | 14.0 | | | 450.0 | | | 11.0 | | | 0 | | |
| 90406-2-75 | 5.1 | | 0.05630 | | | 0.00062 | | | 0.56380 | | | 0.00980 | | | 0.07210 | | | 0.00110 | | | 456.0 | | | 25.0 | | | 453.3 | | | 6.3 | | | 448.5 | | | 6.3 | | | 1 | | |
| 90406-2-76 | 4.0 | | 0.07657 | | | 0.00095 | | | 2.00800 | | | 0.04900 | | | 0.19040 | | | 0.00350 | | | 1107.0 | | | 24.0 | | | 1114.0 | | | 16.0 | | | 1125.0 | | | 19.0 | | | 1 | | |
| 90406-2-77 | 1.5 | | 0.05650 | | | 0.00120 | | | 0.57000 | | | 0.01600 | | | 0.07370 | | | 0.00140 | | | 448.0 | | | 47.0 | | | 457.0 | | | 10.0 | | | 458.5 | | | 8.4 | | | 0 | | |
| 90406-2-78 | 1.7 | | 0.06300 | | | 0.00170 | | | 0.63600 | | | 0.01900 | | | 0.07350 | | | 0.00170 | | | 680.0 | | | 61.0 | | | 498.0 | | | 12.0 | | | 457.0 | | | 10.0 | | | 8 | | |
| 90406-2-79 | 1.1 | | 0.05760 | | | 0.00130 | | | 0.58800 | | | 0.01800 | | | 0.07540 | | | 0.00140 | | | 499.0 | | | 49.0 | | | 468.0 | | | 12.0 | | | 468.6 | | | 8.6 | | | 0 | | |
| 90406-2-80 | 1.3 | | 0.07060 | | | 0.00110 | | | 1.57100 | | | 0.03700 | | | 0.16160 | | | 0.00320 | | | 934.0 | | | 32.0 | | | 955.0 | | | 15.0 | | | 965.0 | | | 18.0 | | | 1 | | |
| 90406-2-81 | 7.7 | | 0.07044 | | | 0.00061 | | | 1.56000 | | | 0.02700 | | | 0.16270 | | | 0.00250 | | | 940.0 | | | 17.0 | | | 952.0 | | | 11.0 | | | 971.0 | | | 14.0 | | | 2 | | |
| 90406-2-82 | 2.1 | | 0.05551 | | | 0.00093 | | | 0.58100 | | | 0.01300 | | | 0.07450 | | | 0.00110 | | | 423.0 | | | 38.0 | | | 464.7 | | | 8.0 | | | 462.9 | | | 6.4 | | | 0 | | |
| 90406-2-83 | 1.3 | | 0.07000 | | | 0.00230 | | | 1.42300 | | | 0.06400 | | | 0.14930 | | | 0.00600 | | | 886.0 | | | 70.0 | | | 894.0 | | | 28.0 | | | 898.0 | | | 35.0 | | | 0 | | |
| 90406-2-84 | 0.7 | | 0.08720 | | | 0.00250 | | | 2.47000 | | | 0.11000 | | | 0.20510 | | | 0.00820 | | | 1335.0 | | | 56.0 | | | 1255.0 | | | 34.0 | | | 1198.0 | | | 43.0 | | | 5 | | |
| 90406-2-85 | 1.2 | | 0.05390 | | | 0.00430 | | | 0.16100 | | | 0.01300 | | | 0.02190 | | | 0.00084 | | | 260.0 | | | 160.0 | | | 153.0 | | | 12.0 | | | 139.6 | | | 5.3 | | | 9 | | |
| 90406-2-86 | 1.5 | | 0.05780 | | | 0.00160 | | | 0.55000 | | | 0.01900 | | | 0.07090 | | | 0.00160 | | | 492.0 | | | 63.0 | | | 444.0 | | | 13.0 | | | 441.3 | | | 9.3 | | | 1 | | |
| 90406-2-87 | 1.2 | | 0.16110 | | | 0.00140 | | | 10.30000 | | | 0.30000 | | | 0.45950 | | | 0.00830 | | | 2463.0 | | | 15.0 | | | 2456.0 | | | 29.0 | | | 2433.0 | | | 37.0 | | | 1 | | |
| 90406-2-88 | 1.3 | | 0.05880 | | | 0.00270 | | | 0.60900 | | | 0.03200 | | | 0.07500 | | | 0.00240 | | | 477.0 | | | 97.0 | | | 479.0 | | | 20.0 | | | 467.0 | | | 15.0 | | | 3 | | |
| 90406-2-89 | 0.8 | | 0.07240 | | | 0.00100 | | | 1.81400 | | | 0.05200 | | | 0.18560 | | | 0.00410 | | | 988.0 | | | 29.0 | | | 1046.0 | | | 19.0 | | | 1096.0 | | | 22.0 | | | 5 | | |
| 90406-2-90 | 2.1 | | 0.06430 | | | 0.00180 | | | 0.63900 | | | 0.02300 | | | 0.07180 | | | 0.00130 | | | 727.0 | | | 60.0 | | | 500.0 | | | 14.0 | | | 447.1 | | | 7.5 | | | 11 | | |
| 90406-2-91 | 1.2 | | 0.07500 | | | 0.00120 | | | 1.86900 | | | 0.04600 | | | 0.17860 | | | 0.00350 | | | 1060.0 | | | 33.0 | | | 1066.0 | | | 16.0 | | | 1061.0 | | | 20.0 | | | 0 | | |
| 90406-2-92 | 18.6 | | 0.06786 | | | 0.00066 | | | 1.37600 | | | 0.02500 | | | 0.14570 | | | 0.00230 | | | 858.0 | | | 20.0 | | | 878.0 | | | 11.0 | | | 876.0 | | | 13.0 | | | 0 | | |
| 90406-2-93 | 2.1 | | 0.05240 | | | 0.00240 | | | 0.19080 | | | 0.00770 | | | 0.02667 | | | 0.00041 | | | 268.0 | | | 89.0 | | | 176.6 | | | 6.5 | | | 169.6 | | | 2.6 | | | 4 | | |
| 90406-2-94 | 1.6 | | 0.07220 | | | 0.00300 | | | 0.67900 | | | 0.03100 | | | 0.06850 | | | 0.00120 | | | 927.0 | | | 77.0 | | | 520.0 | | | 18.0 | | | 426.7 | | | 7.5 | | | 18 | | |
| 90406-2-95 | 2.4 | | 0.05740 | | | 0.00150 | | | 0.56000 | | | 0.01600 | | | 0.07330 | | | 0.00100 | | | 476.0 | | | 57.0 | | | 450.0 | | | 11.0 | | | 455.8 | | | 6.1 | | | 1 | | |
| 90406-2-96 | 1.5 | | 0.07071 | | | 0.00086 | | | 1.50600 | | | 0.04200 | | | 0.15330 | | | 0.00250 | | | 941.0 | | | 25.0 | | | 933.0 | | | 18.0 | | | 919.0 | | | 14.0 | | | 2 | | |
| 90406-2-97 | 1.9 | | 0.06330 | | | 0.00160 | | | 0.64200 | | | 0.02100 | | | 0.07210 | | | 0.00110 | | | 682.0 | | | 54.0 | | | 500.0 | | | 13.0 | | | 448.9 | | | 6.8 | | | 10 | | |
| 90406-2-98 | 2.1 | | 0.06250 | | | 0.00120 | | | 0.62200 | | | 0.01300 | | | 0.07190 | | | 0.00110 | | | 687.0 | | | 39.0 | | | 490.4 | | | 7.9 | | | 447.2 | | | 6.8 | | | 9 | | |
| 90406-2-99 | 1.1 | | 0.05800 | | | 0.00190 | | | 0.59800 | | | 0.02000 | | | 0.07510 | | | 0.00160 | | | 498.0 | | | 70.0 | | | 475.0 | | | 13.0 | | | 466.6 | | | 9.8 | | | 2 | | |
| 90406-2-100 | 1.2 | | 0.05790 | | | 0.00110 | | | 0.56800 | | | 0.01300 | | | 0.07050 | | | 0.00120 | | | 507.0 | | | 42.0 | | | 456.4 | | | 8.2 | | | 439.2 | | | 7.0 | | | 4 | | |
| **946-3, reddish sandstone from the Late Cretaceous Zhoutian Formation, Ganzhou, Jiangxi, China. 25°52'58.43"N, 114°47'20.42"E.** | | | | | | | | | | | | | | | | | | | | | | | | | | | | | | | | | | | | | | | | | |
| 90406_3_01 | 3.0 | | 0.0557 | | | 0.0008 | | | 0.5520 | | | 0.0098 | | | 0.0717 | | | 0.0008 | | | 438.0 | | | 34.0 | | | 445.6 | | | 6.4 | | | 446.6 | | | 5.0 | | | 2 | | |
| 90406_3_02 | 2.8 | | 0.0760 | | | 0.0021 | | | 0.6830 | | | 0.0140 | | | 0.0656 | | | 0.0011 | | | 1067.0 | | | 58.0 | | | 528.5 | | | 8.3 | | | 409.7 | | | 6.4 | | | 50 | | |
| 90406_3_03 | 0.8 | | 0.0708 | | | 0.0015 | | | 1.5860 | | | 0.0410 | | | 0.1628 | | | 0.0031 | | | 931.0 | | | 42.0 | | | 963.0 | | | 16.0 | | | 972.0 | | | 17.0 | | | 3 | | |
| 90406_3_04 | 0.8 | | 0.0670 | | | 0.0015 | | | 1.1900 | | | 0.0340 | | | 0.1296 | | | 0.0024 | | | 812.0 | | | 47.0 | | | 794.0 | | | 16.0 | | | 785.0 | | | 14.0 | | | 2 | | |
| 90406_3_05 | 2.5 | | 0.0563 | | | 0.0009 | | | 0.5430 | | | 0.0100 | | | 0.0702 | | | 0.0009 | | | 448.0 | | | 37.0 | | | 439.5 | | | 6.9 | | | 437.5 | | | 5.4 | | | 2 | | |
| 90406_3_06 | 1.9 | | 0.0566 | | | 0.0010 | | | 0.5700 | | | 0.0120 | | | 0.0730 | | | 0.0009 | | | 459.0 | | | 40.0 | | | 457.0 | | | 7.7 | | | 454.3 | | | 5.1 | | | 0 | | |
| 90406_3_07 | 3.5 | | 0.0595 | | | 0.0014 | | | 0.5650 | | | 0.0120 | | | 0.0686 | | | 0.0010 | | | 572.0 | | | 49.0 | | | 453.6 | | | 7.6 | | | 427.6 | | | 6.2 | | | 21 | | |
| 90406_3_08 | 0.7 | | 0.0644 | | | 0.0014 | | | 1.1340 | | | 0.0310 | | | 0.1276 | | | 0.0023 | | | 734.0 | | | 48.0 | | | 767.0 | | | 15.0 | | | 774.0 | | | 13.0 | | | 4 | | |
| 90406_3_09 | 0.5 | | 0.0711 | | | 0.0026 | | | 1.6230 | | | 0.0800 | | | 0.1643 | | | 0.0055 | | | 918.0 | | | 72.0 | | | 963.0 | | | 31.0 | | | 978.0 | | | 30.0 | | | 5 | | |
| 90406_3_10 | 2.3 | | 0.0565 | | | 0.0009 | | | 0.5582 | | | 0.0096 | | | 0.0716 | | | 0.0007 | | | 462.0 | | | 34.0 | | | 449.7 | | | 6.2 | | | 445.6 | | | 4.1 | | | 3 | | |
| 90406_3_11 | 1.9 | | 0.0699 | | | 0.0013 | | | 0.6720 | | | 0.0120 | | | 0.0699 | | | 0.0008 | | | 908.0 | | | 38.0 | | | 521.1 | | | 7.5 | | | 435.3 | | | 4.9 | | | 43 | | |
| 90406_3_12 | 1.7 | | 0.1529 | | | 0.0012 | | | 8.6000 | | | 0.1700 | | | 0.4063 | | | 0.0070 | | | 2376.0 | | | 14.0 | | | 2291.0 | | | 17.0 | | | 2195.0 | | | 32.0 | | | 4 | | |
| 90406_3_13 | 3.5 | | 0.0567 | | | 0.0010 | | | 0.5368 | | | 0.0097 | | | 0.0687 | | | 0.0007 | | | 461.0 | | | 39.0 | | | 435.6 | | | 6.4 | | | 428.5 | | | 4.3 | | | 6 | | |
| 90406_3_14 | 1.4 | | 0.0684 | | | 0.0011 | | | 0.6380 | | | 0.0140 | | | 0.0673 | | | 0.0008 | | | 877.0 | | | 33.0 | | | 500.0 | | | 8.4 | | | 420.1 | | | 5.0 | | | 43 | | |
| 90406_3_15 | 0.8 | | 0.0712 | | | 0.0011 | | | 1.5470 | | | 0.0340 | | | 0.1571 | | | 0.0023 | | | 954.0 | | | 31.0 | | | 946.0 | | | 13.0 | | | 940.0 | | | 13.0 | | | 1 | | |
| 90406_3_16 | 0.7 | | 0.0759 | | | 0.0017 | | | 1.8440 | | | 0.0590 | | | 0.1758 | | | 0.0041 | | | 1077.0 | | | 47.0 | | | 1053.0 | | | 21.0 | | | 1043.0 | | | 23.0 | | | 2 | | |
| 90406_3_17 | 2.1 | | 0.0579 | | | 0.0008 | | | 0.5398 | | | 0.0082 | | | 0.0676 | | | 0.0006 | | | 519.0 | | | 31.0 | | | 438.5 | | | 5.6 | | | 421.8 | | | 3.4 | | | 16 | | |
| 90406_3_18 | 1.8 | | 0.0616 | | | 0.0012 | | | 0.6010 | | | 0.0120 | | | 0.0710 | | | 0.0009 | | | 640.0 | | | 42.0 | | | 477.9 | | | 7.8 | | | 441.9 | | | 5.4 | | | 25 | | |
| 90406_3_19 | 1.8 | | 0.0721 | | | 0.0009 | | | 1.6270 | | | 0.0310 | | | 0.1633 | | | 0.0023 | | | 984.0 | | | 27.0 | | | 980.0 | | | 12.0 | | | 975.0 | | | 13.0 | | | 0 | | |
| 90406_3_20 | 1.5 | | 0.1348 | | | 0.0032 | | | 3.5700 | | | 0.1500 | | | 0.1906 | | | 0.0068 | | | 2156.0 | | | 41.0 | | | 1539.0 | | | 34.0 | | | 1123.0 | | | 37.0 | | | 29 | | |
| 90406_3_21 | 1.4 | | 0.1641 | | | 0.0019 | | | 10.1300 | | | 0.2800 | | | 0.4450 | | | 0.0110 | | | 2493.0 | | | 19.0 | | | 2435.0 | | | 25.0 | | | 2364.0 | | | 49.0 | | | 2 | | |
| 90406_3_22 | 2.9 | | 0.1072 | | | 0.0021 | | | 0.5223 | | | 0.0092 | | | 0.0351 | | | 0.0004 | | | 1743.0 | | | 36.0 | | | 426.1 | | | 6.1 | | | 222.2 | | | 2.7 | | | 76 | | |
| 90406_3_23 | 0.9 | | 0.0787 | | | 0.0009 | | | 2.0030 | | | 0.0320 | | | 0.1845 | | | 0.0024 | | | 1159.0 | | | 23.0 | | | 1117.0 | | | 11.0 | | | 1091.0 | | | 13.0 | | | 4 | | |
| 90406_3_24 | 1.1 | | 0.1688 | | | 0.0025 | | | 10.0500 | | | 0.3200 | | | 0.4310 | | | 0.0130 | | | 2544.0 | | | 24.0 | | | 2424.0 | | | 30.0 | | | 2301.0 | | | 59.0 | | | 5 | | |
| 90406_3_25 | 1.2 | | 0.1093 | | | 0.0015 | | | 0.7590 | | | 0.0100 | | | 0.0503 | | | 0.0007 | | | 1780.0 | | | 25.0 | | | 572.7 | | | 6.0 | | | 316.5 | | | 4.5 | | | 68 | | |
| 90406_3_26 | 2.1 | | 0.0562 | | | 0.0008 | | | 0.5433 | | | 0.0095 | | | 0.0699 | | | 0.0008 | | | 447.0 | | | 33.0 | | | 439.9 | | | 6.2 | | | 435.8 | | | 4.9 | | | 2 | | |
| 90406_3_27 | 0.4 | | 0.0990 | | | 0.0025 | | | 3.8900 | | | 0.1700 | | | 0.2830 | | | 0.0100 | | | 1596.0 | | | 45.0 | | | 1593.0 | | | 36.0 | | | 1601.0 | | | 49.0 | | | 0 | | |
| 90406_3_28 | 1.1 | | 0.0563 | | | 0.0033 | | | 0.2210 | | | 0.0130 | | | 0.0289 | | | 0.0007 | | | 360.0 | | | 120.0 | | | 202.0 | | | 11.0 | | | 183.7 | | | 4.4 | | | 44 | | |
| 90406_3_29 | 0.9 | | 0.0760 | | | 0.0020 | | | 0.3427 | | | 0.0093 | | | 0.0326 | | | 0.0004 | | | 1078.0 | | | 53.0 | | | 298.4 | | | 7.0 | | | 206.7 | | | 2.7 | | | 72 | | |
| 90406_3_30 | 3.5 | | 0.0586 | | | 0.0013 | | | 0.5370 | | | 0.0140 | | | 0.0663 | | | 0.0011 | | | 530.0 | | | 52.0 | | | 434.7 | | | 9.2 | | | 413.9 | | | 6.4 | | | 18 | | |
| 90406_3_31 | 1.6 | | 0.0715 | | | 0.0010 | | | 1.5390 | | | 0.0340 | | | 0.1555 | | | 0.0029 | | | 969.0 | | | 27.0 | | | 943.0 | | | 14.0 | | | 931.0 | | | 16.0 | | | 3 | | |
| 90406_3_32 | 3.7 | | 0.0562 | | | 0.0012 | | | 0.5390 | | | 0.0120 | | | 0.0695 | | | 0.0008 | | | 439.0 | | | 46.0 | | | 436.6 | | | 7.9 | | | 432.8 | | | 4.8 | | | 1 | | |
| 90406_3_33 | 2.8 | | 0.0710 | | | 0.0010 | | | 1.5290 | | | 0.0300 | | | 0.1558 | | | 0.0022 | | | 948.0 | | | 28.0 | | | 939.0 | | | 12.0 | | | 933.0 | | | 12.0 | | | 1 | | |
| 90406_3_34 | 2.5 | | 0.0571 | | | 0.0011 | | | 0.5660 | | | 0.0130 | | | 0.0717 | | | 0.0011 | | | 481.0 | | | 43.0 | | | 455.3 | | | 8.6 | | | 446.2 | | | 6.4 | | | 5 | | |
| 90406_3_35 | 1.6 | | 0.0651 | | | 0.0010 | | | 0.6450 | | | 0.0130 | | | 0.0716 | | | 0.0009 | | | 763.0 | | | 33.0 | | | 506.1 | | | 8.2 | | | 446.0 | | | 5.1 | | | 34 | | |
| 90406_3_36 | 15.2 | | 0.0710 | | | 0.0010 | | | 1.5320 | | | 0.0270 | | | 0.1561 | | | 0.0020 | | | 956.0 | | | 27.0 | | | 941.0 | | | 11.0 | | | 935.0 | | | 11.0 | | | 2 | | |
| 90406_3_37 | 1.0 | | 0.0613 | | | 0.0018 | | | 0.5890 | | | 0.0190 | | | 0.0694 | | | 0.0011 | | | 614.0 | | | 64.0 | | | 469.0 | | | 12.0 | | | 432.2 | | | 6.6 | | | 24 | | |
| 90406_3_38 | 4.1 | | 0.0564 | | | 0.0011 | | | 0.5300 | | | 0.0120 | | | 0.0677 | | | 0.0009 | | | 447.0 | | | 46.0 | | | 431.0 | | | 8.1 | | | 422.5 | | | 5.1 | | | 4 | | |
| 90406_3_39 | 1.6 | | 0.0570 | | | 0.0014 | | | 0.5740 | | | 0.0160 | | | 0.0726 | | | 0.0013 | | | 467.0 | | | 52.0 | | | 459.0 | | | 10.0 | | | 451.9 | | | 7.7 | | | 2 | | |
| 90406_3_40 | 1.2 | | 0.1300 | | | 0.0160 | | | 1.3100 | | | 0.1600 | | | 0.0730 | | | 0.0032 | | | 1860.0 | | | 250.0 | | | 842.0 | | | 81.0 | | | 454.0 | | | 19.0 | | | 55 | | |
| 90406_3_41 | 1.6 | | 0.0704 | | | 0.0013 | | | 0.6230 | | | 0.0120 | | | 0.0639 | | | 0.0007 | | | 927.0 | | | 39.0 | | | 491.1 | | | 7.6 | | | 399.4 | | | 4.3 | | | 47 | | |
| 90406_3_42 | 2.2 | | 0.0563 | | | 0.0012 | | | 0.5580 | | | 0.0140 | | | 0.0713 | | | 0.0011 | | | 439.0 | | | 49.0 | | | 448.7 | | | 9.0 | | | 444.1 | | | 6.6 | | | 2 | | |
| 90406_3_43 | 1.3 | | 0.0569 | | | 0.0022 | | | 0.5880 | | | 0.0260 | | | 0.0743 | | | 0.0016 | | | 437.0 | | | 85.0 | | | 465.0 | | | 17.0 | | | 462.1 | | | 9.3 | | | 6 | | |
| 90406_3_44 | 2.8 | | 0.0674 | | | 0.0014 | | | 1.0620 | | | 0.0310 | | | 0.1130 | | | 0.0023 | | | 851.0 | | | 46.0 | | | 732.0 | | | 15.0 | | | 690.0 | | | 13.0 | | | 14 | | |
| 90406_3_45 | 1.9 | | 0.0601 | | | 0.0011 | | | 0.5810 | | | 0.0120 | | | 0.0697 | | | 0.0009 | | | 590.0 | | | 38.0 | | | 464.0 | | | 7.6 | | | 435.0 | | | 5.6 | | | 21 | | |
| 90406_3_46 | 2.2 | | 0.0771 | | | 0.0007 | | | 1.9520 | | | 0.0270 | | | 0.1825 | | | 0.0020 | | | 1120.0 | | | 17.0 | | | 1097.6 | | | 9.4 | | | 1081.0 | | | 11.0 | | | 2 | | |
| 90406_3_47 | 1.7 | | 0.0709 | | | 0.0010 | | | 1.5040 | | | 0.0280 | | | 0.1535 | | | 0.0024 | | | 957.0 | | | 29.0 | | | 930.0 | | | 11.0 | | | 920.0 | | | 13.0 | | | 3 | | |
| 90406_3_48 | 0.8 | | 0.1683 | | | 0.0012 | | | 9.2600 | | | 0.2100 | | | 0.3964 | | | 0.0077 | | | 2539.0 | | | 12.0 | | | 2357.0 | | | 21.0 | | | 2149.0 | | | 36.0 | | | 7 | | |
| 90406_3_49 | 1.4 | | 0.0791 | | | 0.0019 | | | 1.9890 | | | 0.0640 | | | 0.1815 | | | 0.0038 | | | 1150.0 | | | 46.0 | | | 1105.0 | | | 21.0 | | | 1074.0 | | | 20.0 | | | 4 | | |
| 90406_3_50 | 0.3 | | 0.0751 | | | 0.0026 | | | 1.7840 | | | 0.0890 | | | 0.1707 | | | 0.0065 | | | 1042.0 | | | 69.0 | | | 1028.0 | | | 31.0 | | | 1013.0 | | | 35.0 | | | 1 | | |
| 90406_3_51 | 1.3 | | 0.0805 | | | 0.0012 | | | 0.7700 | | | 0.0120 | | | 0.0693 | | | 0.0007 | | | 1203.0 | | | 28.0 | | | 579.0 | | | 6.7 | | | 431.9 | | | 4.3 | | | 52 | | |
| 90406_3_52 | 1.6 | | 0.0731 | | | 0.0016 | | | 1.5950 | | | 0.0420 | | | 0.1591 | | | 0.0032 | | | 1006.0 | | | 44.0 | | | 966.0 | | | 17.0 | | | 951.0 | | | 18.0 | | | 4 | | |
| 90406_3_53 | 1.2 | | 0.0720 | | | 0.0013 | | | 1.5990 | | | 0.0400 | | | 0.1606 | | | 0.0032 | | | 969.0 | | | 38.0 | | | 965.0 | | | 16.0 | | | 959.0 | | | 18.0 | | | 0 | | |
| 90406_3_54 | 2.3 | | 0.0565 | | | 0.0010 | | | 0.5430 | | | 0.0110 | | | 0.0696 | | | 0.0008 | | | 456.0 | | | 39.0 | | | 439.6 | | | 7.0 | | | 433.8 | | | 5.0 | | | 4 | | |
| 90406_3_55 | 3.2 | | 0.1623 | | | 0.0018 | | | 10.0000 | | | 0.2800 | | | 0.4420 | | | 0.0100 | | | 2474.0 | | | 18.0 | | | 2426.0 | | | 25.0 | | | 2367.0 | | | 45.0 | | | 2 | | |
| 90406_3_56 | 1.7 | | 0.0579 | | | 0.0011 | | | 0.5770 | | | 0.0110 | | | 0.0725 | | | 0.0010 | | | 508.0 | | | 40.0 | | | 461.7 | | | 7.3 | | | 450.8 | | | 6.3 | | | 9 | | |
| 90406_3_57 | 2.4 | | 0.0606 | | | 0.0024 | | | 0.5860 | | | 0.0250 | | | 0.0703 | | | 0.0016 | | | 565.0 | | | 83.0 | | | 466.0 | | | 16.0 | | | 437.5 | | | 9.3 | | | 18 | | |
| 90406_3_58 | 2.0 | | 0.0567 | | | 0.0014 | | | 0.5560 | | | 0.0150 | | | 0.0713 | | | 0.0012 | | | 469.0 | | | 55.0 | | | 447.0 | | | 9.5 | | | 443.6 | | | 7.5 | | | 5 | | |
| 90406_3_59 | 1.8 | | 0.0549 | | | 0.0020 | | | 0.5330 | | | 0.0210 | | | 0.0700 | | | 0.0016 | | | 369.0 | | | 78.0 | | | 430.0 | | | 14.0 | | | 435.9 | | | 9.9 | | | 17 | | |
| 90406_3_60 | 1.9 | | 0.0568 | | | 0.0012 | | | 0.5610 | | | 0.0150 | | | 0.0713 | | | 0.0009 | | | 462.0 | | | 46.0 | | | 450.5 | | | 9.6 | | | 443.9 | | | 5.4 | | | 2 | | |
| 90406_3_61 | 1.1 | | 0.0664 | | | 0.0012 | | | 1.1870 | | | 0.0280 | | | 0.1302 | | | 0.0021 | | | 807.0 | | | 39.0 | | | 792.0 | | | 13.0 | | | 788.0 | | | 12.0 | | | 2 | | |
| 90406_3_62 | 2.5 | | 0.0471 | | | 0.0023 | | | 0.1066 | | | 0.0055 | | | 0.0163 | | | 0.0003 | | | 49.0 | | | 99.0 | | | 102.4 | | | 5.1 | | | 104.5 | | | 1.7 | | | 109 | | |
| 90406_3_63 | 1.5 | | 0.0582 | | | 0.0024 | | | 0.5610 | | | 0.0260 | | | 0.0708 | | | 0.0017 | | | 464.0 | | | 90.0 | | | 450.0 | | | 17.0 | | | 441.0 | | | 10.0 | | | 3 | | |
| 90406_3_64 | 4.1 | | 0.0558 | | | 0.0014 | | | 0.5430 | | | 0.0150 | | | 0.0713 | | | 0.0013 | | | 414.0 | | | 55.0 | | | 439.0 | | | 10.0 | | | 444.0 | | | 7.6 | | | 6 | | |
| 90406_3_65 | 2.5 | | 0.1591 | | | 0.0011 | | | 9.6700 | | | 0.1400 | | | 0.4449 | | | 0.0060 | | | 2443.0 | | | 12.0 | | | 2401.0 | | | 14.0 | | | 2371.0 | | | 27.0 | | | 2 | | |
| 90406_3_66 | 5.7 | | 0.0601 | | | 0.0012 | | | 0.7750 | | | 0.0180 | | | 0.0943 | | | 0.0017 | | | 598.0 | | | 43.0 | | | 581.0 | | | 10.0 | | | 580.6 | | | 9.8 | | | 3 | | |
| 90406_3_67 | 6.9 | | 0.0709 | | | 0.0011 | | | 1.5950 | | | 0.0340 | | | 0.1642 | | | 0.0025 | | | 946.0 | | | 33.0 | | | 967.0 | | | 13.0 | | | 979.0 | | | 14.0 | | | 2 | | |
| 90406_3_68 | 2.0 | | 0.0578 | | | 0.0009 | | | 0.5536 | | | 0.0093 | | | 0.0700 | | | 0.0007 | | | 508.0 | | | 33.0 | | | 446.7 | | | 6.0 | | | 436.3 | | | 4.2 | | | 12 | | |
| 90406_3_69 | 0.4 | | 0.0589 | | | 0.0014 | | | 0.6020 | | | 0.0160 | | | 0.0746 | | | 0.0010 | | | 543.0 | | | 52.0 | | | 477.0 | | | 10.0 | | | 463.7 | | | 6.2 | | | 12 | | |
| 90406_3_70 | 0.7 | | 0.1130 | | | 0.0110 | | | 2.0500 | | | 0.2200 | | | 0.1307 | | | 0.0045 | | | 1600.0 | | | 160.0 | | | 1076.0 | | | 66.0 | | | 794.0 | | | 26.0 | | | 33 | | |
| 90406_3_71 | 1.7 | | 0.0594 | | | 0.0017 | | | 0.5490 | | | 0.0180 | | | 0.0678 | | | 0.0013 | | | 539.0 | | | 64.0 | | | 442.0 | | | 12.0 | | | 422.6 | | | 7.7 | | | 18 | | |
| 90406_3_72 | 2.4 | | 0.0574 | | | 0.0013 | | | 0.5450 | | | 0.0120 | | | 0.0697 | | | 0.0010 | | | 494.0 | | | 51.0 | | | 440.8 | | | 8.1 | | | 434.3 | | | 5.9 | | | 11 | | |
| 90406_3_73 | 1.9 | | 0.0652 | | | 0.0008 | | | 0.9190 | | | 0.0150 | | | 0.1024 | | | 0.0012 | | | 778.0 | | | 24.0 | | | 660.6 | | | 7.9 | | | 628.1 | | | 7.3 | | | 15 | | |
| 90406_3_74 | 1.7 | | 0.1635 | | | 0.0017 | | | 10.1400 | | | 0.2200 | | | 0.4527 | | | 0.0096 | | | 2488.0 | | | 18.0 | | | 2441.0 | | | 20.0 | | | 2408.0 | | | 43.0 | | | 2 | | |
| 90406_3_75 | 2.1 | | 0.0609 | | | 0.0011 | | | 0.5780 | | | 0.0100 | | | 0.0692 | | | 0.0008 | | | 620.0 | | | 38.0 | | | 462.2 | | | 6.7 | | | 431.5 | | | 4.6 | | | 25 | | |
| 90406_3_76 | 3.1 | | 0.0595 | | | 0.0018 | | | 0.5520 | | | 0.0170 | | | 0.0684 | | | 0.0012 | | | 541.0 | | | 66.0 | | | 446.0 | | | 11.0 | | | 426.3 | | | 7.2 | | | 18 | | |
| 90406_3_77 | 6.0 | | 0.0698 | | | 0.0008 | | | 1.4140 | | | 0.0210 | | | 0.1477 | | | 0.0015 | | | 916.0 | | | 24.0 | | | 893.6 | | | 8.8 | | | 887.8 | | | 8.4 | | | 2 | | |
| 90406_3_78 | 1.3 | | 0.0799 | | | 0.0023 | | | 0.6820 | | | 0.0210 | | | 0.0624 | | | 0.0009 | | | 1167.0 | | | 52.0 | | | 526.0 | | | 12.0 | | | 389.8 | | | 5.2 | | | 55 | | |
| 90406_3_79 | 1.6 | | 0.1836 | | | 0.0015 | | | 12.1400 | | | 0.2100 | | | 0.4839 | | | 0.0079 | | | 2683.0 | | | 13.0 | | | 2610.0 | | | 17.0 | | | 2541.0 | | | 34.0 | | | 3 | | |
| 90406_3_80 | 2.2 | | 0.0655 | | | 0.0013 | | | 0.6350 | | | 0.0140 | | | 0.0705 | | | 0.0010 | | | 769.0 | | | 43.0 | | | 497.8 | | | 8.9 | | | 438.8 | | | 5.7 | | | 35 | | |
| 90406_3_81 | 2.7 | | 0.0578 | | | 0.0011 | | | 0.5450 | | | 0.0110 | | | 0.0688 | | | 0.0009 | | | 505.0 | | | 40.0 | | | 440.6 | | | 7.4 | | | 429.1 | | | 5.2 | | | 13 | | |
| 90406_3_82 | 2.7 | | 0.0619 | | | 0.0017 | | | 0.5840 | | | 0.0170 | | | 0.0681 | | | 0.0010 | | | 657.0 | | | 59.0 | | | 466.0 | | | 11.0 | | | 424.7 | | | 5.7 | | | 29 | | |
| 90406_3_83 | 2.5 | | 0.0564 | | | 0.0009 | | | 0.5391 | | | 0.0098 | | | 0.0693 | | | 0.0008 | | | 452.0 | | | 37.0 | | | 437.1 | | | 6.4 | | | 431.9 | | | 4.6 | | | 3 | | |
| 90406_3_84 | 2.5 | | 0.0563 | | | 0.0010 | | | 0.5470 | | | 0.0110 | | | 0.0704 | | | 0.0010 | | | 448.0 | | | 40.0 | | | 442.0 | | | 7.4 | | | 438.7 | | | 5.8 | | | 1 | | |
| 90406_3_85 | 1.5 | | 0.0656 | | | 0.0013 | | | 0.6250 | | | 0.0150 | | | 0.0693 | | | 0.0010 | | | 772.0 | | | 42.0 | | | 491.9 | | | 9.0 | | | 432.1 | | | 5.7 | | | 36 | | |
| 90406_3_86 | 2.8 | | 0.0559 | | | 0.0012 | | | 0.5360 | | | 0.0140 | | | 0.0698 | | | 0.0010 | | | 424.0 | | | 49.0 | | | 434.4 | | | 9.3 | | | 435.0 | | | 5.8 | | | 2 | | |
| 90406_3_87 | 0.7 | | 0.0750 | | | 0.0016 | | | 1.6100 | | | 0.0380 | | | 0.1563 | | | 0.0023 | | | 1053.0 | | | 41.0 | | | 970.0 | | | 15.0 | | | 936.0 | | | 13.0 | | | 8 | | |
| 90406_3_88 | 1.4 | | 0.0579 | | | 0.0020 | | | 0.5370 | | | 0.0210 | | | 0.0669 | | | 0.0013 | | | 471.0 | | | 70.0 | | | 433.0 | | | 14.0 | | | 417.3 | | | 7.8 | | | 8 | | |
| 90406_3_89 | 2.5 | | 0.0573 | | | 0.0009 | | | 0.5471 | | | 0.0098 | | | 0.0691 | | | 0.0008 | | | 494.0 | | | 34.0 | | | 442.4 | | | 6.5 | | | 430.5 | | | 5.0 | | | 10 | | |
| 90406_3_90 | 2.3 | | 0.0683 | | | 0.0028 | | | 0.6640 | | | 0.0280 | | | 0.0706 | | | 0.0010 | | | 810.0 | | | 83.0 | | | 516.0 | | | 18.0 | | | 439.5 | | | 6.0 | | | 36 | | |
| 90406_3_91 | 1.8 | | 0.3522 | | | 0.0032 | | | 34.5000 | | | 0.8200 | | | 0.7090 | | | 0.0160 | | | 3714.0 | | | 14.0 | | | 3617.0 | | | 23.0 | | | 3447.0 | | | 59.0 | | | 3 | | |
| 90406_3_92 | 2.6 | | 0.0803 | | | 0.0014 | | | 1.8420 | | | 0.0440 | | | 0.1656 | | | 0.0031 | | | 1189.0 | | | 34.0 | | | 1056.0 | | | 15.0 | | | 987.0 | | | 17.0 | | | 11 | | |
| 90406_3_93 | 2.8 | | 0.0551 | | | 0.0009 | | | 0.5210 | | | 0.0110 | | | 0.0685 | | | 0.0008 | | | 402.0 | | | 38.0 | | | 425.7 | | | 6.7 | | | 426.8 | | | 4.8 | | | 6 | | |
| 90406_3_94 | 3.5 | | 0.0576 | | | 0.0014 | | | 0.5910 | | | 0.0170 | | | 0.0737 | | | 0.0012 | | | 489.0 | | | 55.0 | | | 471.0 | | | 11.0 | | | 458.3 | | | 7.1 | | | 4 | | |
| 90406_3_95 | 0.8 | | 0.0609 | | | 0.0045 | | | 0.3060 | | | 0.0200 | | | 0.0371 | | | 0.0009 | | | 470.0 | | | 140.0 | | | 266.0 | | | 15.0 | | | 234.5 | | | 5.7 | | | 43 | | |
| 90406_3_96 | 1.9 | | 0.0600 | | | 0.0012 | | | 0.5840 | | | 0.0130 | | | 0.0700 | | | 0.0008 | | | 585.0 | | | 42.0 | | | 466.6 | | | 8.3 | | | 436.3 | | | 4.8 | | | 20 | | |
| 90406_3_97 | 1.7 | | 0.0579 | | | 0.0011 | | | 0.5590 | | | 0.0120 | | | 0.0695 | | | 0.0007 | | | 508.0 | | | 41.0 | | | 449.6 | | | 7.6 | | | 432.8 | | | 4.5 | | | 11 | | |
| 90406_3_98 | 4.0 | | 0.0683 | | | 0.0017 | | | 0.8330 | | | 0.0290 | | | 0.0874 | | | 0.0021 | | | 866.0 | | | 51.0 | | | 613.0 | | | 16.0 | | | 540.0 | | | 13.0 | | | 29 | | |
| 90406_3_99 | 0.9 | | 0.1684 | | | 0.0021 | | | 10.6400 | | | 0.3100 | | | 0.4560 | | | 0.0120 | | | 2535.0 | | | 21.0 | | | 2484.0 | | | 27.0 | | | 2414.0 | | | 54.0 | | | 2 | | |
| 90406_3_100 | 1.4 | | 0.0560 | | | 0.0028 | | | 0.5420 | | | 0.0320 | | | 0.0694 | | | 0.0019 | | | 370.0 | | | 100.0 | | | 432.0 | | | 20.0 | | | 432.0 | | | 12.0 | | | 17 | | |
| **946-4, reddish sandstone from the Late Cretaceous Zhoutian Formation, Ganzhou, Jiangxi, China. 25°49'42.11"N, 114°47'56.15"E.** | | | | | | | | | | | | | | | | | | | | | | | | | | | | | | | | | | | | | | | | | |
| 90406_4_01 | 7.4 | | 0.1284 | | | 0.0012 | | | 4.1630 | | | 0.0790 | | | 0.2285 | | | 0.0049 | | | 2073.0 | | | 16.0 | | | 1663.0 | | | 16.0 | | | 1325.0 | | | 26.0 | | | 20 | | |
| 90406_4_02 | 0.9 | | 0.2531 | | | 0.0065 | | | 6.8300 | | | 0.3400 | | | 0.2220 | | | 0.0110 | | | 3202.0 | | | 41.0 | | | 2087.0 | | | 46.0 | | | 1290.0 | | | 58.0 | | | 35 | | |
| 90406_4_03 | 0.9 | | 0.0990 | | | 0.0015 | | | 3.3180 | | | 0.0870 | | | 0.2267 | | | 0.0045 | | | 1601.0 | | | 27.0 | | | 1482.0 | | | 20.0 | | | 1316.0 | | | 24.0 | | | 7 | | |
| 90406_4_04 | 3.2 | | 0.0811 | | | 0.0010 | | | 1.8770 | | | 0.0420 | | | 0.1582 | | | 0.0028 | | | 1218.0 | | | 26.0 | | | 1070.0 | | | 15.0 | | | 946.0 | | | 16.0 | | | 12 | | |
| 90406_4_05 | 0.8 | | 0.1713 | | | 0.0015 | | | 10.9700 | | | 0.1800 | | | 0.4625 | | | 0.0093 | | | 2568.0 | | | 14.0 | | | 2519.0 | | | 15.0 | | | 2446.0 | | | 41.0 | | | 2 | | |
| 90406_4_06 | 3.8 | | 0.1439 | | | 0.0018 | | | 6.4100 | | | 0.2300 | | | 0.3130 | | | 0.0130 | | | 2268.0 | | | 21.0 | | | 2016.0 | | | 31.0 | | | 1758.0 | | | 68.0 | | | 11 | | |
| 90406_4_07 | 2.2 | | 0.1490 | | | 0.0014 | | | 6.3400 | | | 0.1400 | | | 0.2891 | | | 0.0075 | | | 2331.0 | | | 16.0 | | | 2025.0 | | | 21.0 | | | 1644.0 | | | 35.0 | | | 13 | | |
| 90406_4_08 | 3.4 | | 0.0928 | | | 0.0015 | | | 0.9450 | | | 0.0200 | | | 0.0715 | | | 0.0013 | | | 1475.0 | | | 31.0 | | | 674.0 | | | 11.0 | | | 445.1 | | | 8.0 | | | 54 | | |
| 90406_4_09 | 3.3 | | 0.0858 | | | 0.0010 | | | 2.3050 | | | 0.0410 | | | 0.2058 | | | 0.0035 | | | 1330.0 | | | 22.0 | | | 1212.0 | | | 13.0 | | | 1206.0 | | | 19.0 | | | 9 | | |
| 90406_4_10 | 1.8 | | 0.0884 | | | 0.0013 | | | 1.4340 | | | 0.0330 | | | 0.1172 | | | 0.0021 | | | 1382.0 | | | 27.0 | | | 900.0 | | | 14.0 | | | 714.0 | | | 12.0 | | | 35 | | |
| 90406_4_11 | 4.9 | | 0.0743 | | | 0.0007 | | | 1.8110 | | | 0.0270 | | | 0.1754 | | | 0.0028 | | | 1044.0 | | | 19.0 | | | 1047.5 | | | 9.6 | | | 1043.0 | | | 16.0 | | | 0 | | |
| 90406_4_12 | 17.6 | | 0.0606 | | | 0.0008 | | | 0.6010 | | | 0.0120 | | | 0.0669 | | | 0.0012 | | | 617.0 | | | 30.0 | | | 478.3 | | | 7.1 | | | 417.4 | | | 7.5 | | | 22 | | |
| 90406_4_13 | 1.1 | | 0.0976 | | | 0.0018 | | | 1.9660 | | | 0.0450 | | | 0.1424 | | | 0.0033 | | | 1569.0 | | | 33.0 | | | 1101.0 | | | 15.0 | | | 858.0 | | | 18.0 | | | 30 | | |
| 90406_4_14 | 4.3 | | 0.1394 | | | 0.0034 | | | 4.6200 | | | 0.2400 | | | 0.2037 | | | 0.0099 | | | 2214.0 | | | 43.0 | | | 1755.0 | | | 48.0 | | | 1208.0 | | | 60.0 | | | 21 | | |
| 90406_4_15 | 2.3 | | 0.0595 | | | 0.0009 | | | 0.5840 | | | 0.0130 | | | 0.0682 | | | 0.0012 | | | 576.0 | | | 31.0 | | | 466.2 | | | 8.1 | | | 425.3 | | | 7.2 | | | 19 | | |
| 90406_4_16 | 1.2 | | 0.1198 | | | 0.0019 | | | 3.5000 | | | 0.1200 | | | 0.2153 | | | 0.0076 | | | 1959.0 | | | 24.0 | | | 1525.0 | | | 28.0 | | | 1256.0 | | | 41.0 | | | 22 | | |
| 90406_4_17 | 2.3 | | 0.2556 | | | 0.0065 | | | 2.6920 | | | 0.0960 | | | 0.0877 | | | 0.0029 | | | 3213.0 | | | 39.0 | | | 1322.0 | | | 26.0 | | | 542.0 | | | 17.0 | | | 59 | | |
| 90406_4_18 | 34.0 | | 0.0768 | | | 0.0011 | | | 1.6390 | | | 0.0370 | | | 0.1477 | | | 0.0033 | | | 1108.0 | | | 29.0 | | | 983.0 | | | 14.0 | | | 887.0 | | | 18.0 | | | 11 | | |
| 90406_4_19 | 6.4 | | 0.0872 | | | 0.0013 | | | 1.8830 | | | 0.0680 | | | 0.1605 | | | 0.0030 | | | 1358.0 | | | 28.0 | | | 1069.0 | | | 24.0 | | | 959.0 | | | 17.0 | | | 21 | | |
| 90406_4_20 | 1.2 | | 0.2124 | | | 0.0024 | | | 14.0700 | | | 0.3800 | | | 0.4590 | | | 0.0100 | | | 2921.0 | | | 18.0 | | | 2751.0 | | | 25.0 | | | 2431.0 | | | 45.0 | | | 6 | | |
| 90406_4_21 | 1.8 | | 0.1717 | | | 0.0012 | | | 6.5600 | | | 0.1400 | | | 0.2726 | | | 0.0050 | | | 2572.0 | | | 12.0 | | | 2054.0 | | | 18.0 | | | 1555.0 | | | 25.0 | | | 20 | | |
| 90406_4_22 | 1.7 | | 0.2405 | | | 0.0050 | | | 1.0440 | | | 0.0320 | | | 0.0302 | | | 0.0009 | | | 3117.0 | | | 33.0 | | | 724.0 | | | 16.0 | | | 191.9 | | | 5.4 | | | 77 | | |
| 90406_4_23 | 2.5 | | 0.1093 | | | 0.0015 | | | 4.4700 | | | 0.1300 | | | 0.3055 | | | 0.0057 | | | 1781.0 | | | 25.0 | | | 1722.0 | | | 25.0 | | | 1717.0 | | | 28.0 | | | 3 | | |
| 90406_4_24 | 0.5 | | 0.1980 | | | 0.0120 | | | 4.1800 | | | 0.3500 | | | 0.1344 | | | 0.0067 | | | 2750.0 | | | 110.0 | | | 1632.0 | | | 71.0 | | | 811.0 | | | 38.0 | | | 41 | | |
| 90406_4_25 | 1.1 | | 0.1869 | | | 0.0065 | | | 0.9700 | | | 0.0540 | | | 0.0349 | | | 0.0012 | | | 2706.0 | | | 57.0 | | | 680.0 | | | 28.0 | | | 220.9 | | | 7.3 | | | 75 | | |
| 90406_4_26 | 2.3 | | 0.0811 | | | 0.0007 | | | 2.0170 | | | 0.0320 | | | 0.1761 | | | 0.0032 | | | 1222.0 | | | 16.0 | | | 1119.0 | | | 11.0 | | | 1045.0 | | | 17.0 | | | 8 | | |
| 90406_4_27 | 2.8 | | 0.0771 | | | 0.0015 | | | 1.9020 | | | 0.0500 | | | 0.1767 | | | 0.0042 | | | 1116.0 | | | 37.0 | | | 1079.0 | | | 18.0 | | | 1048.0 | | | 23.0 | | | 3 | | |
| 90406_4_28 | 1.2 | | 0.1137 | | | 0.0011 | | | 5.2600 | | | 0.1100 | | | 0.3325 | | | 0.0063 | | | 1855.0 | | | 18.0 | | | 1859.0 | | | 18.0 | | | 1848.0 | | | 30.0 | | | 0 | | |
| 90406_4_29 | 1.0 | | 0.0863 | | | 0.0035 | | | 2.2060 | | | 0.0720 | | | 0.2200 | | | 0.0110 | | | 1336.0 | | | 77.0 | | | 1182.0 | | | 23.0 | | | 1282.0 | | | 60.0 | | | 12 | | |
| 90406_4_30 | 5.5 | | 0.0856 | | | 0.0010 | | | 2.5790 | | | 0.0480 | | | 0.2177 | | | 0.0037 | | | 1326.0 | | | 23.0 | | | 1291.0 | | | 14.0 | | | 1268.0 | | | 20.0 | | | 3 | | |
| 90406_4_31 | 0.8 | | 0.0805 | | | 0.0008 | | | 1.9670 | | | 0.0310 | | | 0.1706 | | | 0.0031 | | | 1205.0 | | | 20.0 | | | 1104.0 | | | 11.0 | | | 1015.0 | | | 17.0 | | | 8 | | |
| 90406_4_32 | 3.2 | | 0.0810 | | | 0.0010 | | | 1.6820 | | | 0.0360 | | | 0.1519 | | | 0.0053 | | | 1215.0 | | | 25.0 | | | 999.0 | | | 13.0 | | | 909.0 | | | 30.0 | | | 18 | | |
| 90406_4_33 | 2.0 | | 0.3014 | | | 0.0056 | | | 2.1610 | | | 0.0600 | | | 0.0543 | | | 0.0013 | | | 3469.0 | | | 29.0 | | | 1164.0 | | | 19.0 | | | 340.7 | | | 8.0 | | | 66 | | |
| 90406_4_34 | 1.2 | | 0.1143 | | | 0.0034 | | | 2.4200 | | | 0.1500 | | | 0.1363 | | | 0.0062 | | | 1855.0 | | | 53.0 | | | 1244.0 | | | 47.0 | | | 822.0 | | | 35.0 | | | 33 | | |
| 90406_4_35 | 2.6 | | 0.0723 | | | 0.0007 | | | 1.4960 | | | 0.0270 | | | 0.1427 | | | 0.0023 | | | 994.0 | | | 19.0 | | | 927.0 | | | 11.0 | | | 860.0 | | | 13.0 | | | 7 | | |
| 90406_4_36 | 2.2 | | 0.0725 | | | 0.0009 | | | 0.9670 | | | 0.0140 | | | 0.0985 | | | 0.0020 | | | 994.0 | | | 24.0 | | | 686.5 | | | 7.3 | | | 605.0 | | | 11.0 | | | 31 | | |
| 90406_4_37 | 1.8 | | 0.0779 | | | 0.0017 | | | 0.9930 | | | 0.0300 | | | 0.0866 | | | 0.0022 | | | 1138.0 | | | 47.0 | | | 698.0 | | | 16.0 | | | 535.0 | | | 13.0 | | | 39 | | |
| 90406_4_38 | 1.5 | | 0.0800 | | | 0.0012 | | | 1.1490 | | | 0.0530 | | | 0.1018 | | | 0.0051 | | | 1188.0 | | | 30.0 | | | 769.0 | | | 25.0 | | | 623.0 | | | 30.0 | | | 35 | | |
| 90406_4_39 | 2.0 | | 0.3790 | | | 0.0410 | | | 13.0000 | | | 2.1000 | | | 0.2800 | | | 0.0260 | | | 3800.0 | | | 160.0 | | | 2650.0 | | | 160.0 | | | 1590.0 | | | 130.0 | | | 30 | | |
| 90406_4_40 | 1.8 | | 0.1340 | | | 0.0050 | | | 1.4840 | | | 0.0850 | | | 0.0692 | | | 0.0037 | | | 2139.0 | | | 64.0 | | | 919.0 | | | 34.0 | | | 431.0 | | | 22.0 | | | 57 | | |
| 90406_4_41 | 1.9 | | 0.1263 | | | 0.0033 | | | 1.6940 | | | 0.0710 | | | 0.1121 | | | 0.0052 | | | 2039.0 | | | 47.0 | | | 1003.0 | | | 25.0 | | | 684.0 | | | 30.0 | | | 51 | | |
| 90406_4_42 | 2.2 | | 0.0732 | | | 0.0009 | | | 1.5690 | | | 0.0300 | | | 0.1503 | | | 0.0035 | | | 1010.0 | | | 25.0 | | | 956.0 | | | 12.0 | | | 904.0 | | | 19.0 | | | 5 | | |
| 90406_4_43 | 3.2 | | 0.3470 | | | 0.0410 | | | 5.4800 | | | 0.6600 | | | 0.1360 | | | 0.0052 | | | 3580.0 | | | 180.0 | | | 1851.0 | | | 93.0 | | | 821.0 | | | 29.0 | | | 48 | | |
| 90406_4_44 | 1.0 | | 0.1151 | | | 0.0009 | | | 4.4300 | | | 0.1400 | | | 0.2729 | | | 0.0060 | | | 1879.0 | | | 14.0 | | | 1706.0 | | | 26.0 | | | 1553.0 | | | 30.0 | | | 9 | | |
| 90406_4_45 | 3.3 | | 0.1447 | | | 0.0015 | | | 0.8130 | | | 0.0410 | | | 0.0406 | | | 0.0013 | | | 2280.0 | | | 18.0 | | | 597.0 | | | 23.0 | | | 256.4 | | | 8.2 | | | 74 | | |
| 90406_4_46 | 1.7 | | 0.1565 | | | 0.0079 | | | 1.4150 | | | 0.0840 | | | 0.0737 | | | 0.0035 | | | 2399.0 | | | 85.0 | | | 891.0 | | | 35.0 | | | 458.0 | | | 21.0 | | | 63 | | |
| 90406_4_47 | 1.3 | | 0.0949 | | | 0.0021 | | | 1.6620 | | | 0.0550 | | | 0.1268 | | | 0.0043 | | | 1517.0 | | | 41.0 | | | 991.0 | | | 21.0 | | | 769.0 | | | 24.0 | | | 35 | | |
| 90406_4_48 | 4.3 | | 0.1369 | | | 0.0017 | | | 1.9910 | | | 0.0490 | | | 0.1115 | | | 0.0032 | | | 2186.0 | | | 21.0 | | | 1111.0 | | | 17.0 | | | 681.0 | | | 19.0 | | | 49 | | |
| 90406_4_49 | 2.9 | | 0.1392 | | | 0.0018 | | | 5.6700 | | | 0.1100 | | | 0.2933 | | | 0.0080 | | | 2214.0 | | | 22.0 | | | 1923.0 | | | 16.0 | | | 1654.0 | | | 40.0 | | | 13 | | |
| 90406_4_50 | 1.3 | | 0.1005 | | | 0.0024 | | | 1.8460 | | | 0.0780 | | | 0.1324 | | | 0.0053 | | | 1620.0 | | | 45.0 | | | 1060.0 | | | 29.0 | | | 800.0 | | | 30.0 | | | 35 | | |
| 90406_4_51 | 7.0 | | 0.0781 | | | 0.0011 | | | 1.4280 | | | 0.0290 | | | 0.1189 | | | 0.0022 | | | 1148.0 | | | 27.0 | | | 899.0 | | | 12.0 | | | 724.0 | | | 13.0 | | | 22 | | |
| 90406_4_52 | 1.4 | | 0.0919 | | | 0.0009 | | | 2.5800 | | | 0.0490 | | | 0.1905 | | | 0.0051 | | | 1467.0 | | | 20.0 | | | 1297.0 | | | 14.0 | | | 1123.0 | | | 27.0 | | | 12 | | |
| 90406_4_53 | 0.8 | | 0.0920 | | | 0.0048 | | | 1.2620 | | | 0.0820 | | | 0.0903 | | | 0.0036 | | | 1400.0 | | | 110.0 | | | 815.0 | | | 36.0 | | | 557.0 | | | 21.0 | | | 42 | | |
| 90406_4_54 | 1.4 | | 0.3000 | | | 0.0170 | | | 3.8400 | | | 0.2900 | | | 0.1146 | | | 0.0065 | | | 3460.0 | | | 89.0 | | | 1594.0 | | | 62.0 | | | 699.0 | | | 38.0 | | | 54 | | |
| 90406_4_55 | 1.2 | | 0.1212 | | | 0.0019 | | | 5.0300 | | | 0.1500 | | | 0.2779 | | | 0.0091 | | | 1974.0 | | | 27.0 | | | 1818.0 | | | 25.0 | | | 1576.0 | | | 46.0 | | | 8 | | |
| 90406_4_56 | 0.7 | | 0.1989 | | | 0.0015 | | | 14.5000 | | | 0.2300 | | | 0.4976 | | | 0.0094 | | | 2816.0 | | | 12.0 | | | 2779.0 | | | 15.0 | | | 2604.0 | | | 39.0 | | | 1 | | |
| 90406_4_57 | 0.8 | | 0.1155 | | | 0.0032 | | | 3.3900 | | | 0.1400 | | | 0.2056 | | | 0.0047 | | | 1885.0 | | | 51.0 | | | 1496.0 | | | 32.0 | | | 1204.0 | | | 25.0 | | | 21 | | |
| 90406_4_58 | 2.5 | | 0.1044 | | | 0.0038 | | | 1.7120 | | | 0.0980 | | | 0.1022 | | | 0.0038 | | | 1680.0 | | | 63.0 | | | 1000.0 | | | 33.0 | | | 626.0 | | | 22.0 | | | 40 | | |
| 90406_4_59 | 1.4 | | 0.1156 | | | 0.0056 | | | 1.4600 | | | 0.0790 | | | 0.1116 | | | 0.0033 | | | 1869.0 | | | 89.0 | | | 910.0 | | | 32.0 | | | 682.0 | | | 19.0 | | | 51 | | |
| 90406_4_60 | 0.6 | | 0.1718 | | | 0.0057 | | | 1.8810 | | | 0.0750 | | | 0.0751 | | | 0.0029 | | | 2556.0 | | | 56.0 | | | 1073.0 | | | 27.0 | | | 466.0 | | | 17.0 | | | 58 | | |
| 90406_4_61 | 2.6 | | 0.1676 | | | 0.0020 | | | 7.8300 | | | 0.1700 | | | 0.3529 | | | 0.0090 | | | 2533.0 | | | 19.0 | | | 2208.0 | | | 19.0 | | | 1946.0 | | | 43.0 | | | 13 | | |
| 90406_4_62 | 3.7 | | 0.1653 | | | 0.0010 | | | 9.9700 | | | 0.1100 | | | 0.4362 | | | 0.0081 | | | 2510.2 | | | 9.8 | | | 2430.0 | | | 10.0 | | | 2330.0 | | | 36.0 | | | 3 | | |
| 90406_4_63 | 0.6 | | 0.0909 | | | 0.0009 | | | 2.8550 | | | 0.0510 | | | 0.2061 | | | 0.0039 | | | 1440.0 | | | 19.0 | | | 1368.0 | | | 13.0 | | | 1207.0 | | | 21.0 | | | 5 | | |
| 90406_4_64 | 1.9 | | 0.1198 | | | 0.0023 | | | 2.5160 | | | 0.0660 | | | 0.1440 | | | 0.0040 | | | 1940.0 | | | 35.0 | | | 1271.0 | | | 19.0 | | | 866.0 | | | 23.0 | | | 34 | | |
| 90406_4_65 | 1.0 | | 0.1010 | | | 0.0024 | | | 0.9450 | | | 0.0320 | | | 0.0641 | | | 0.0018 | | | 1633.0 | | | 44.0 | | | 674.0 | | | 16.0 | | | 400.0 | | | 11.0 | | | 59 | | |
| 90406_4_66 | 1.3 | | 0.0798 | | | 0.0009 | | | 1.9280 | | | 0.0330 | | | 0.1670 | | | 0.0035 | | | 1188.0 | | | 22.0 | | | 1089.0 | | | 11.0 | | | 995.0 | | | 20.0 | | | 8 | | |
| 90406_4_67 | 2.3 | | 0.1236 | | | 0.0013 | | | 5.6400 | | | 0.1300 | | | 0.3044 | | | 0.0070 | | | 2005.0 | | | 19.0 | | | 1916.0 | | | 20.0 | | | 1710.0 | | | 35.0 | | | 4 | | |
| 90406_4_68 | 1.2 | | 0.0737 | | | 0.0015 | | | 0.5830 | | | 0.0110 | | | 0.0602 | | | 0.0012 | | | 1032.0 | | | 38.0 | | | 465.8 | | | 7.2 | | | 376.9 | | | 7.0 | | | 55 | | |
| 90406_4_69 | 1.7 | | 0.0841 | | | 0.0014 | | | 1.8580 | | | 0.0430 | | | 0.1576 | | | 0.0036 | | | 1287.0 | | | 32.0 | | | 1064.0 | | | 15.0 | | | 943.0 | | | 20.0 | | | 17 | | |
| 90406_4_70 | 2.7 | | 0.2192 | | | 0.0082 | | | 3.1600 | | | 0.3500 | | | 0.1180 | | | 0.0110 | | | 2964.0 | | | 61.0 | | | 1439.0 | | | 99.0 | | | 718.0 | | | 62.0 | | | 51 | | |
| 90406_4_71 | 1.6 | | 0.1172 | | | 0.0031 | | | 0.5030 | | | 0.0190 | | | 0.0291 | | | 0.0009 | | | 1891.0 | | | 46.0 | | | 411.0 | | | 13.0 | | | 184.6 | | | 5.9 | | | 78 | | |
| 90406_4_72 | 1.1 | | 0.1308 | | | 0.0025 | | | 3.4800 | | | 0.1100 | | | 0.2086 | | | 0.0067 | | | 2111.0 | | | 36.0 | | | 1518.0 | | | 25.0 | | | 1220.0 | | | 35.0 | | | 28 | | |
| 90406_4_73 | 1.7 | | 0.0848 | | | 0.0019 | | | 0.6490 | | | 0.0160 | | | 0.0550 | | | 0.0019 | | | 1294.0 | | | 43.0 | | | 507.0 | | | 10.0 | | | 345.0 | | | 12.0 | | | 61 | | |
| 90406_4_74 | 2.0 | | 0.0796 | | | 0.0021 | | | 0.8030 | | | 0.0260 | | | 0.0654 | | | 0.0016 | | | 1171.0 | | | 52.0 | | | 596.0 | | | 15.0 | | | 408.4 | | | 9.5 | | | 49 | | |
| 90406_4_75 | 1.8 | | 0.0906 | | | 0.0023 | | | 0.9050 | | | 0.0280 | | | 0.0763 | | | 0.0021 | | | 1421.0 | | | 51.0 | | | 653.0 | | | 15.0 | | | 474.0 | | | 12.0 | | | 54 | | |
| 90406_4_76 | 1.6 | | 0.0763 | | | 0.0017 | | | 0.7760 | | | 0.0220 | | | 0.0681 | | | 0.0016 | | | 1100.0 | | | 43.0 | | | 581.0 | | | 13.0 | | | 424.2 | | | 9.9 | | | 47 | | |
| 90406_4_77 | 3.0 | | 0.1160 | | | 0.0010 | | | 5.8100 | | | 0.1200 | | | 0.3530 | | | 0.0073 | | | 1893.0 | | | 17.0 | | | 1944.0 | | | 18.0 | | | 1946.0 | | | 35.0 | | | 3 | | |
| 90406_4_78 | 0.9 | | 0.1275 | | | 0.0018 | | | 4.2000 | | | 0.1500 | | | 0.2292 | | | 0.0089 | | | 2058.0 | | | 24.0 | | | 1664.0 | | | 30.0 | | | 1326.0 | | | 46.0 | | | 19 | | |
| 90406_4_79 | 3.0 | | 0.0635 | | | 0.0006 | | | 1.2010 | | | 0.0140 | | | 0.1319 | | | 0.0011 | | | 720.0 | | | 20.0 | | | 800.3 | | | 6.4 | | | 798.6 | | | 6.2 | | | 11 | | |
| 90406_4_80 | 1.1 | | 0.0625 | | | 0.0019 | | | 0.6080 | | | 0.0210 | | | 0.0694 | | | 0.0013 | | | 665.0 | | | 65.0 | | | 481.0 | | | 14.0 | | | 432.3 | | | 7.9 | | | 28 | | |
| 90406_4_81 | 0.5 | | 0.0645 | | | 0.0024 | | | 0.2230 | | | 0.0094 | | | 0.0249 | | | 0.0004 | | | 702.0 | | | 80.0 | | | 203.4 | | | 7.7 | | | 158.4 | | | 2.5 | | | 71 | | |
| 90406_4_82 | 0.9 | | 0.0661 | | | 0.0021 | | | 0.6260 | | | 0.0240 | | | 0.0675 | | | 0.0013 | | | 785.0 | | | 68.0 | | | 490.0 | | | 15.0 | | | 421.2 | | | 7.7 | | | 38 | | |
| 90406_4_83 | 2.2 | | 0.0698 | | | 0.0008 | | | 1.5350 | | | 0.0220 | | | 0.1578 | | | 0.0017 | | | 918.0 | | | 23.0 | | | 943.4 | | | 8.9 | | | 944.4 | | | 9.6 | | | 3 | | |
| 90406_4_84 | 2.0 | | 0.0882 | | | 0.0040 | | | 0.8910 | | | 0.0520 | | | 0.0711 | | | 0.0018 | | | 1350.0 | | | 96.0 | | | 638.0 | | | 27.0 | | | 442.0 | | | 11.0 | | | 53 | | |
| 90406_4_85 | 2.2 | | 0.0744 | | | 0.0011 | | | 1.7410 | | | 0.0420 | | | 0.1652 | | | 0.0034 | | | 1045.0 | | | 28.0 | | | 1020.0 | | | 16.0 | | | 984.0 | | | 19.0 | | | 2 | | |
| 90406_4_86 | 1.3 | | 0.0555 | | | 0.0011 | | | 0.5520 | | | 0.0120 | | | 0.0703 | | | 0.0010 | | | 414.0 | | | 42.0 | | | 445.0 | | | 7.7 | | | 438.1 | | | 5.7 | | | 7 | | |
| 90406_4_87 | 0.8 | | 0.0630 | | | 0.0013 | | | 0.5420 | | | 0.0120 | | | 0.0613 | | | 0.0009 | | | 682.0 | | | 46.0 | | | 439.0 | | | 7.6 | | | 383.6 | | | 5.7 | | | 36 | | |
| 90406_4_88 | 0.5 | | 0.0615 | | | 0.0015 | | | 0.5680 | | | 0.0180 | | | 0.0656 | | | 0.0015 | | | 631.0 | | | 56.0 | | | 456.0 | | | 12.0 | | | 409.2 | | | 9.3 | | | 28 | | |
| 90406_4_89 | 1.4 | | 0.0614 | | | 0.0015 | | | 0.5830 | | | 0.0170 | | | 0.0672 | | | 0.0010 | | | 636.0 | | | 54.0 | | | 466.0 | | | 11.0 | | | 419.0 | | | 5.7 | | | 27 | | |
| 90406_4_90 | 1.2 | | 0.0616 | | | 0.0021 | | | 1.1590 | | | 0.0490 | | | 0.1330 | | | 0.0041 | | | 615.0 | | | 69.0 | | | 778.0 | | | 24.0 | | | 803.0 | | | 23.0 | | | 27 | | |
| 90406_4_91 | 2 | | 0.0593 | | | 0.0021 | | | 0.6020 | | | 0.0280 | | | 0.0728 | | | 0.0020 | | | 548.0 | | | 75.0 | | | 476.0 | | | 18.0 | | | 453.0 | | | 12.0 | | | 13 | | |
| 90406_4_92 | 0.6 | | 0.0545 | | | 0.0009 | | | 0.5179 | | | 0.0097 | | | 0.0663 | | | 0.0007 | | | 381.0 | | | 39.0 | | | 424.7 | | | 6.8 | | | 413.5 | | | 4.3 | | | 11 | | |
| 90406_4_93 | 1.4 | | 0.0588 | | | 0.0015 | | | 0.4600 | | | 0.0130 | | | 0.0545 | | | 0.0011 | | | 532.0 | | | 59.0 | | | 383.3 | | | 8.9 | | | 341.9 | | | 6.4 | | | 28 | | |
| 90406_4_94 | 1.7 | | 0.0593 | | | 0.0012 | | | 0.5260 | | | 0.0100 | | | 0.0618 | | | 0.0010 | | | 561.0 | | | 44.0 | | | 428.6 | | | 7.0 | | | 386.2 | | | 5.8 | | | 24 | | |
| 90406_4_95 | 0.6 | | 0.0592 | | | 0.0012 | | | 0.5570 | | | 0.0130 | | | 0.0656 | | | 0.0010 | | | 566.0 | | | 44.0 | | | 448.6 | | | 8.6 | | | 409.7 | | | 6.3 | | | 21 | | |
| 90406_4_96 | 1.3 | | 0.0480 | | | 0.0026 | | | 0.1602 | | | 0.0087 | | | 0.0237 | | | 0.0005 | | | 70.0 | | | 110.0 | | | 150.0 | | | 7.6 | | | 151.0 | | | 3.3 | | | 114 | | |
| 90406_4_97 | 1.3 | | 0.0776 | | | 0.0013 | | | 0.4316 | | | 0.0091 | | | 0.0393 | | | 0.0006 | | | 1133.0 | | | 35.0 | | | 364.7 | | | 6.2 | | | 248.3 | | | 3.4 | | | 68 | | |
| 90406_4_98 | 2.2 | | 0.0550 | | | 0.0009 | | | 0.5372 | | | 0.0099 | | | 0.0693 | | | 0.0009 | | | 403.0 | | | 39.0 | | | 436.8 | | | 6.7 | | | 432.2 | | | 5.2 | | | 8 | | |
| **946-5, crystal tuff from the Late Cretaceous Maodian Formation, Ganzhou, Jiangxi, China. 25°55′17.26″N;114°59′13.90″E** | | | | | | | | | | | | | | | | | | | | | | | | | | | | | | | | | | | | | | | | | |
| 90406_5_01 | 1.1 | | 0.0645 | | 0.0027 | | | 0.6294 | | | 0.0256 | | | 0.0707 | | | 0.0009 | | | 766.7 | | | 88.9 | | | 495.7 | | | 16.0 | | | 440.2 | | | 5.5 | | | 11.2 | | |
| 90406_5_02 | 1.6 | | 0.3395 | | 0.0313 | | | 0.6081 | | | 0.0434 | | | 0.0135 | | | 0.0006 | | | 3660.8 | | | 141.4 | | | 482.3 | | | 27.4 | | | 86.6 | | | 4.0 | | | 82.0 | | |
| 90406_5_03 | 2.2 | | 0.0600 | | 0.0027 | | | 0.0480 | | | 0.0022 | | | 0.0058 | | | 0.0001 | | | 605.6 | | | 98.1 | | | 47.7 | | | 2.1 | | | 37.3 | | | 0.4 | | | 21.8 | | |
| 90406_5_04 | 3.8 | | 0.2780 | | 0.0095 | | | 0.3144 | | | 0.0104 | | | 0.0082 | | | 0.0001 | | | 3351.5 | | | 54.2 | | | 277.6 | | | 8.0 | | | 52.5 | | | 0.7 | | | 81.1 | | |
| 90406_5_05 | 0.8 | | 0.0564 | | 0.0022 | | | 0.1506 | | | 0.0062 | | | 0.0192 | | | 0.0002 | | | 477.8 | | | 82.4 | | | 142.4 | | | 5.5 | | | 122.5 | | | 1.3 | | | 14.0 | | |
| 90406_5_06 | 2.3 | | 0.0647 | | 0.0023 | | | 1.1441 | | | 0.0381 | | | 0.1287 | | | 0.0013 | | | 764.8 | | | 69.4 | | | 774.4 | | | 18.1 | | | 780.2 | | | 7.3 | | | 0.7 | | |
| 90406_5_07 | 2.4 | | 0.0628 | | 0.0034 | | | 0.0521 | | | 0.0027 | | | 0.0060 | | | 0.0001 | | | 701.9 | | | 114.8 | | | 51.5 | | | 2.6 | | | 38.9 | | | 0.5 | | | 24.6 | | |
| 90406_5_08 | 17.5 | | 0.0528 | | 0.0013 | | | 0.3463 | | | 0.0130 | | | 0.0472 | | | 0.0013 | | | 320.4 | | | 55.6 | | | 302.0 | | | 9.8 | | | 297.4 | | | 7.8 | | | 1.5 | | |
| 90406_5_09 | 19.5 | | 0.0484 | | 0.0014 | | | 0.1593 | | | 0.0047 | | | 0.0237 | | | 0.0002 | | | 116.8 | | | 66.7 | | | 150.1 | | | 4.1 | | | 150.9 | | | 1.2 | | | 0.6 | | |
| 90406_5_10 | 0.7 | | 0.1138 | | 0.0020 | | | 4.6697 | | | 0.0820 | | | 0.2964 | | | 0.0023 | | | 1861.1 | | | 32.3 | | | 1761.8 | | | 14.7 | | | 1673.3 | | | 11.7 | | | 5.0 | | |
| 90406_5_11 | 2.4 | | 0.0557 | | 0.0017 | | | 0.3113 | | | 0.0092 | | | 0.0405 | | | 0.0004 | | | 438.9 | | | 66.7 | | | 275.2 | | | 7.1 | | | 256.0 | | | 2.3 | | | 7.0 | | |
| 90406_5_12 | 0.7 | | 0.0650 | | 0.0029 | | | 0.3291 | | | 0.0150 | | | 0.0365 | | | 0.0005 | | | 775.9 | | | 92.6 | | | 288.9 | | | 11.5 | | | 230.9 | | | 2.8 | | | 20.1 | | |
| 90406_5_13 | 2.7 | | 0.0588 | | 0.0018 | | | 0.5469 | | | 0.0158 | | | 0.0675 | | | 0.0007 | | | 561.1 | | | 63.9 | | | 443.0 | | | 10.4 | | | 421.1 | | | 4.0 | | | 4.9 | | |
| 90406_5_14 | 3.5 | | 0.0544 | | 0.0020 | | | 0.1673 | | | 0.0060 | | | 0.0223 | | | 0.0002 | | | 387.1 | | | 88.0 | | | 157.1 | | | 5.2 | | | 142.2 | | | 1.2 | | | 9.5 | | |
| 90406_5_15 | 2.4 | | 0.0618 | | 0.0020 | | | 0.1251 | | | 0.0040 | | | 0.0146 | | | 0.0002 | | | 733.3 | | | 73.1 | | | 119.7 | | | 3.6 | | | 93.7 | | | 1.0 | | | 21.7 | | |
| 90406_5_16 | 1.3 | | 0.0698 | | 0.0041 | | | 0.1740 | | | 0.0100 | | | 0.0185 | | | 0.0003 | | | 921.9 | | | 122.2 | | | 162.9 | | | 8.7 | | | 118.1 | | | 2.1 | | | 27.5 | | |
| 90406_5_17 | 3.7 | | 0.0571 | | 0.0018 | | | 0.5294 | | | 0.0167 | | | 0.0671 | | | 0.0006 | | | 494.5 | | | 70.4 | | | 431.4 | | | 11.1 | | | 418.9 | | | 3.6 | | | 2.9 | | |
| 90406_5_18 | 1.8 | | 0.0720 | | 0.0037 | | | 0.2720 | | | 0.0142 | | | 0.0274 | | | 0.0004 | | | 987.0 | | | 106.0 | | | 244.3 | | | 11.3 | | | 174.2 | | | 2.5 | | | 28.7 | | |
| 90406_5_19 | 2.8 | | 0.0575 | | 0.0015 | | | 0.4616 | | | 0.0112 | | | 0.0583 | | | 0.0005 | | | 522.3 | | | 57.4 | | | 385.4 | | | 7.8 | | | 365.0 | | | 2.8 | | | 5.3 | | |
| 90406_5_20 | 1.4 | | 0.0554 | | 0.0013 | | | 0.5444 | | | 0.0129 | | | 0.0709 | | | 0.0006 | | | 427.8 | | | 51.8 | | | 441.3 | | | 8.5 | | | 441.8 | | | 3.6 | | | 0.1 | | |
| 90406_5_21 | 2.4 | | 0.0759 | | 0.0034 | | | 0.6988 | | | 0.0294 | | | 0.0667 | | | 0.0008 | | | 1094.4 | | | 88.9 | | | 538.0 | | | 17.6 | | | 416.1 | | | 4.7 | | | 22.7 | | |
| 90406_5_22 | 1.5 | | 0.0554 | | 0.0024 | | | 0.2953 | | | 0.0120 | | | 0.0388 | | | 0.0004 | | | 431.5 | | | 96.3 | | | 262.7 | | | 9.4 | | | 245.6 | | | 2.4 | | | 6.5 | | |
| 90406_5_23 | 1.7 | | 0.0542 | | 0.0018 | | | 0.2727 | | | 0.0088 | | | 0.0365 | | | 0.0003 | | | 388.9 | | | 75.9 | | | 244.8 | | | 7.0 | | | 231.0 | | | 1.9 | | | 5.6 | | |
| 90406_5_24 | 3.9 | | 0.0578 | | 0.0017 | | | 0.2413 | | | 0.0069 | | | 0.0301 | | | 0.0003 | | | 520.4 | | | 63.0 | | | 219.5 | | | 5.6 | | | 191.5 | | | 1.7 | | | 12.7 | | |
| 90406_5_25 | 1.8 | | 0.1281 | | 0.0049 | | | 0.6962 | | | 0.0268 | | | 0.0392 | | | 0.0005 | | | 2071.9 | | | 68.2 | | | 536.5 | | | 16.0 | | | 248.1 | | | 3.0 | | | 53.8 | | |
| 90406_5_26 | 0.8 | | 0.0684 | | 0.0019 | | | 0.6484 | | | 0.0168 | | | 0.0684 | | | 0.0006 | | | 879.6 | | | 83.3 | | | 507.5 | | | 10.4 | | | 426.8 | | | 3.5 | | | 15.9 | | |
| 90406_5_27 | 1.9 | | 0.0671 | | 0.0021 | | | 0.3710 | | | 0.0111 | | | 0.0399 | | | 0.0003 | | | 842.6 | | | 64.8 | | | 320.4 | | | 8.2 | | | 252.4 | | | 1.8 | | | 21.2 | | |
| 90406_5_28 | 0.8 | | 0.0650 | | 0.0017 | | | 0.8367 | | | 0.0222 | | | 0.0927 | | | 0.0008 | | | 775.9 | | | 53.7 | | | 617.3 | | | 12.3 | | | 571.4 | | | 4.8 | | | 7.4 | | |
| 90406_5_29 | 4.0 | | 0.0569 | | 0.0017 | | | 0.4716 | | | 0.0142 | | | 0.0597 | | | 0.0005 | | | 487.1 | | | 64.8 | | | 392.3 | | | 9.8 | | | 373.7 | | | 2.9 | | | 4.8 | | |
| 90406_5_30 | 1.3 | 0.0562 | | 0.0021 | | | 0.2859 | | | 0.0103 | | | 0.0368 | | | 0.0003 | | | 461.2 | | | 85.2 | | | 255.3 | | | 8.1 | | | 233.1 | | | 2.1 | | | 8.7 | | |
